# Supplementary material for: Supporting the spread and scale-up of electronic consultation across Canada: cross-sectional analysis
Source: PubMed Central journal article supplement — BMJ Open. 2019 May 30;9(5):e028888. doi: 10.1136/bmjopen-2018-028888 (PMC6550029; doi:10.1136/bmjopen-2018-028888), 2019-05-30
Supplement: bmjopen-2018-028888.draft_revisions.pdf [file bmjopen-2018-028888.draft_revisions.pdf]

# BMJ Open

BMJ Open is committed to open peer review. As part of this commitment we make the peer review history of every article we publish publicly available.

When an article is published we post the peer reviewers' comments and the authors' responses online. We also post the versions of the paper that were used during peer review. These are the versions that the peer review comments apply to.

The versions of the paper that follow are the versions that were submitted during the peer review process. They are not the versions of record or the final published versions. They should not be cited or distributed as the published version of this manuscript.

BMJ Open is an open access journal and the full, final, typeset and author-corrected version of record of the manuscript is available on our site with no access controls, subscription charges or pay-per-view fees (<http://bmjopen.bmj.com>).

If you have any questions on BMJ Open's open peer review process please email [info.bmjopen@bmj.com](mailto:info.bmjopen@bmj.com)

# BMJ Open

## Supporting the Spread and Scale-up of eConsult across Canada: a cross-sectional analysis

|                               |                                                                                                                                                                                                                                                                                                                                                                                                                                                                                                                                                                                                                                                                                                                                                                                                                                                                                        |
|-------------------------------|----------------------------------------------------------------------------------------------------------------------------------------------------------------------------------------------------------------------------------------------------------------------------------------------------------------------------------------------------------------------------------------------------------------------------------------------------------------------------------------------------------------------------------------------------------------------------------------------------------------------------------------------------------------------------------------------------------------------------------------------------------------------------------------------------------------------------------------------------------------------------------------|
| Journal:                      | <i>BMJ Open</i>                                                                                                                                                                                                                                                                                                                                                                                                                                                                                                                                                                                                                                                                                                                                                                                                                                                                        |
| Manuscript ID                 | bmjopen-2018-028888                                                                                                                                                                                                                                                                                                                                                                                                                                                                                                                                                                                                                                                                                                                                                                                                                                                                    |
| Article Type:                 | Research                                                                                                                                                                                                                                                                                                                                                                                                                                                                                                                                                                                                                                                                                                                                                                                                                                                                               |
| Date Submitted by the Author: | 31-Dec-2018                                                                                                                                                                                                                                                                                                                                                                                                                                                                                                                                                                                                                                                                                                                                                                                                                                                                            |
| Complete List of Authors:     | Liddy, Clare; Elisabeth Bruyere Research Institute, C.T. Lamont Primary Health Care<br>Bello, A; University of Alberta, Edmonton, Alberta, Canada. , Medicine<br>Cook, Jean; Newfoundland and Labrador Medical Association<br>Drimer, Neil; Canadian Foundation for Healthcare Improvement<br>Dumas Pilon, Maxine; McGill University, Family Medicine<br>Farrell, Gerard; Memorial University of Newfoundland, Family Medicine<br>Glassford, Jodi; Alberta Health Services<br>Ireland, Laurie; Nine Circles Community Health Centre<br>McDonald, Rana; Nine Circles Community Health Centre<br>Nabelsi, Véronique; Université du Quebec<br>Oppenheimer, Luis; University of Manitoba, Surgery<br>Singer , Alexander; University of Manitoba College of Medicine, Department of Family Medicine ; Manitoba Primary Care Research Network<br>Keely, Erin; University of Ottawa, Medicine |
| Keywords:                     | PRIMARY CARE, eConsult, Referral, Access to care, Wait times                                                                                                                                                                                                                                                                                                                                                                                                                                                                                                                                                                                                                                                                                                                                                                                                                           |
|                               |                                                                                                                                                                                                                                                                                                                                                                                                                                                                                                                                                                                                                                                                                                                                                                                                                                                                                        |

SCHOLARONE™  
Manuscripts

## Supporting the Spread and Scale-up of eConsult across Canada: a cross-sectional analysis

|                                                                    |                                                                              |
|--------------------------------------------------------------------|------------------------------------------------------------------------------|
| Clare Liddy, MD, MSc, CCFP, FCFP <sup>1,2</sup>                    | <a href="mailto:cliddy@bruyere.org">cliddy@bruyere.org</a>                   |
| Aminu Bello, MD, PhD, FRCP, FACP, FASN <sup>3</sup>                | <a href="mailto:aminu1@ualberta.ca">aminu1@ualberta.ca</a>                   |
| Jean Cook <sup>4</sup>                                             | <a href="mailto:JCook@nlma.nl.ca">JCook@nlma.nl.ca</a>                       |
| Neil Drimer, MHSc, CHE <sup>5</sup>                                | <a href="mailto:Neil.Drimer@cfhi-fcass.ca">Neil.Drimer@cfhi-fcass.ca</a>     |
| Maxine Dumas Pilon, MD <sup>6</sup>                                | <a href="mailto:maxine.dumaspilon@mcgill.ca">maxine.dumaspilon@mcgill.ca</a> |
| Gerard Farrell, MD <sup>7</sup>                                    | <a href="mailto:gfarrell@mun.ca">gfarrell@mun.ca</a>                         |
| Jodi Glassford <sup>8</sup>                                        | <a href="mailto:Jodi.Glassford@ahs.ca">Jodi.Glassford@ahs.ca</a>             |
| Laurie Ireland, MD, CCFP <sup>9</sup>                              | <a href="mailto:Lireland@ninecircles.ca">Lireland@ninecircles.ca</a>         |
| Rana McDonald, MA <sup>9</sup>                                     | <a href="mailto:RMcDonald@ninecircles.ca">RMcDonald@ninecircles.ca</a>       |
| Véronique Nabelsi, MScA, PhD <sup>10</sup>                         | <a href="mailto:veronique.nabelsi@uqo.ca">veronique.nabelsi@uqo.ca</a>       |
| Luis Oppenheimer, MD, PhD, FRCS(C), FACS, CCFP(hon.) <sup>11</sup> | <a href="mailto:loppenheimer@hsc.mb.ca">loppenheimer@hsc.mb.ca</a>           |
| Alex Singer, MD, BAO, BCh, CCFP <sup>12</sup>                      | <a href="mailto:alexandersinger@gmail.com">alexandersinger@gmail.com</a>     |
| Erin Keely, MD FRCPC <sup>13,14</sup>                              | <a href="mailto:ekeely@toh.on.ca">ekeely@toh.on.ca</a>                       |

<sup>1</sup>C.T. Lamont Primary Health Care Research Centre, Department of Family Medicine, University of Ottawa, Ottawa, Ontario, Canada

<sup>2</sup> Bruyère Research Institute, Ottawa, Ontario, Canada

<sup>3</sup>Department of Medicine, University of Alberta, Calgary, Alberta, Canada

<sup>4</sup>Newfoundland and Labrador Medical Association, St. John's, Newfoundland and Labrador, Canada

<sup>5</sup>Canadian Foundation for Healthcare Improvement, Ottawa, Ontario, Canada

<sup>6</sup>Department of Family Medicine, McGill University, Montreal, Quebec, Canada

<sup>7</sup>Department of Family Medicine, Memorial University, St. John's, Newfoundland and Labrador, Canada

<sup>8</sup>Alberta Referral Pathways, Calgary, Alberta, Canada

<sup>9</sup>Nine Circles Community Health Centre, Winnipeg, Manitoba, Canada

<sup>10</sup>Université du Québec, Gatineau, Québec, Canada

<sup>11</sup>Department of Surgery, University of Manitoba, Winnipeg, Manitoba, Canada

<sup>12</sup>Department of Family Medicine, University of Manitoba, Winnipeg, Manitoba, Canada

<sup>13</sup>Department of Medicine, University of Ottawa, Ottawa, Ontario, Canada

<sup>14</sup>Division of Endocrinology/Metabolism, The Ottawa Hospital, Ottawa, Ontario, Canada

Corresponding author at:

Clare Liddy

Bruyère Research Institute

43 Bruyère St, Annex E, Room 106

Ottawa, ON K1N 5C8

Tel.: 613- 562-6262 ext. 2928

Fax: 613-562-6099

e-mail: [cliddy@bruyere.org](mailto:cliddy@bruyere.org)

## Abstract

**Objective:** To examine the process of implementing an electronic consultation (eConsult) service and evaluate its impact along key metrics outlined by the RE-AIM framework.

**Design:** Cross-sectional study.

**Setting:** Clinics using eConsult in four provinces across Canada: Alberta, Manitoba, Quebec, and Newfoundland and Labrador.

**Participants:** All cases submitted through services in the four participating provinces were included.

**Intervention:** The eConsult service is a secure online application that allows primary care providers and specialists to communicate regarding a patient's care. We measured impact using system utilization data and mandatory close-out surveys completed at the end of each eConsult.

**Main outcome measures:** Implementation progress and impact were examined using the five categories outlined by the RE-AIM framework: reach, effectiveness, adoption, implementation, and maintenance.

**Results:** Four provinces provided data from different periods, ranging from four years (Alberta) to ten months (Manitoba). The total number of cases completed ranged from 96 cases (Manitoba) to 6,885 cases (Alberta). Newfoundland had the largest menu of available specialties (n=35), while Alberta had the smallest (n=17). The most frequently requested groups varied across provinces, with only endocrinology appearing in the top five for all provinces. The average specialist response time ranged from 3 days (Manitoba) to 16.7 days (Alberta). Between 54% (Newfoundland) and 66% (Manitoba) of cases resulted in new or additional information. PCPs avoided completing referrals they had originally considered in 36% (Newfoundland) to 53% of cases (Manitoba), while only between 27% (Quebec) and 29% (Newfoundland) of cases resulted

1  
2  
3 in a referral. In every province, services demonstrated higher rates of usage in their last quarter  
4  
5 of data than their first.  
6

7  
8 **Conclusions:** eConsult was successfully implemented in four new provinces across Canada.  
9

10 Implementation strategies and scope varied, but services demonstrated substantial consistency on  
11  
12 several key metrics, most notably on whether new information was learned and impact on  
13  
14 decision to refer.  
15

16  
17 **Keywords:** Primary care; eConsult; referral; access to care; wait times.  
18  
19

## 20 21 **Article Summary**

### 22 *Strengths and limitations of this study*

- 23  
24 • Study data spans four provinces and multiple regions, allowing for a robust examination  
25  
26 of eConsult's generalizability and scalability.  
27  
28
- 29 • The data included was observational and clinician based, which does not allow for a  
30  
31 direct patient perspective.  
32  
33
- 34 • Differences in service structure and data collection meant some metrics could not be  
35  
36 captured across all participating services.  
37  
38  
39  
40  
41  
42  
43  
44  
45  
46  
47  
48  
49  
50  
51  
52  
53  
54  
55  
56  
57  
58  
59  
60

## Introduction

Excessive wait times for specialist care are a serious issue across Canada.(1;2) In the 2016 Commonwealth Fund survey, Canada placed last on the measure of specialist access among eleven countries surveyed.(1) Poor access to specialist advice has serious consequences, reducing patients' ability to carry out day-to-day activities, increasing anxiety, and potentially causing an overall deterioration in health.(2) On a health service level, long wait times result in delayed diagnoses, duplicated testing, and dissatisfaction among health care providers—factors that increase costs while reducing quality of care.(3)

In an effort to address this issue, the Champlain BASE™ (Building Access to Specialists through eConsultation) eConsult service was launched in 2010. The BASE™ model of care is a method of care delivery designed to improve access to specialist advice by allowing primary care providers (PCP) to send questions concerning patient care to specialists. It is not a specific technology, and can be adopted on any digital platform capable of facilitating secure communication between PCPs and specialists. In the BASE™ model of care, PCPs seeking specialist advice on a patient's care log onto their platform and select a specialty group (as opposed to an individual specialist). A case assigner allocates the eConsult to an appropriate specialist based on availability. The specialist responds to the PCP's question within one week by providing advice on how to manage the patient, recommending the patient receive a face-to-face referral (not necessarily with them), or requesting additional information. PCPs can ask additional questions. Specialties are added to the service based on PCP requests, and the service undergoes continual evaluation to ensure quality and seek user feedback.

Launched as a small proof-of-concept and soon expanded to a full pilot in the Champlain health region of Eastern Ontario, Canada, the eConsult service has completed over 50,000

1  
2  
3 eConsults, enrolled more than 1,400 PCPs, and provides access to 114 specialty groups.  
4  
5 Specialists respond to cases in a median of 1.9 days, and over two-thirds of cases are resolved  
6  
7 without the patient requiring a face-to-face specialist visit.(4) Given its success on a regional  
8  
9 level, the eConsult team engaged in efforts to expand the service to new jurisdictions. However,  
10  
11 Canada faces a number of barriers to successful scale-up, resulting in many projects being unable  
12  
13 to expand beyond their pilot phase.(5;6) In order to avoid these pitfalls, we successfully sought  
14  
15 grants from the Canadian Institutes of Health Research. Through this process, the eConsult team  
16  
17 formed key partnerships with provincial and national organizations in order to support its  
18  
19 expansion to new jurisdictions within Ontario(7) and across provinces. As part of this initiative,  
20  
21 multiple eConsult teams based in their own jurisdictions worked closely with the Canadian  
22  
23 Foundation for Healthcare Improvement (CHFI), which supported eConsult's spread and scale  
24  
25 through a two-phase Connected Medicine Collaborative (Figure 1).  
26  
27  
28  
29

30  
31 Phase 1 of the Collaborative recruited 10 teams from across Canada and internationally  
32  
33 to participate in a 9-month Access to Specialist eConsult Collaborative, in which teams aimed to  
34  
35 develop business cases and strategies to implement one of two remote consult services in their  
36  
37 jurisdictions: the Champlain BASE™ eConsult service, and the telephone-based Rapid Access to  
38  
39 Consultative Expertise (RACE) service.(8) CFHI supported teams by facilitating sharing of  
40  
41 information and hosting multiple online and face-to-face touchpoints with the innovators and  
42  
43 new implementation sites. Phase 2 built on the previous initiative to launch a 15-month Quality  
44  
45 Improvement Collaborative, with 11 teams in 7 provinces participating.(9) As a result of these  
46  
47 initiatives, eConsult services have been launched in Alberta, Manitoba, Quebec, Newfoundland  
48  
49 and Labrador, and New Brunswick. Throughout this process, the teams have encountered various  
50  
51  
52  
53  
54  
55  
56  
57  
58  
59  
60

1  
2  
3 challenges and learned a number of important lessons, which will be relevant to those seeking to  
4 spread, scale and sustain health care innovations.  
5  
6

7  
8 In this study, we examine the process of implementing eConsult in four Canadian  
9 provinces, and evaluate their impact along key metrics outlined by the RE-AIM framework.  
10  
11

## 12 **Methods**

### 13 *Design*

14  
15 This study involves a cross-sectional analysis of data from eConsult services implemented in  
16 four provinces across Canada.  
17  
18

### 19 *Setting*

20  
21 In order to evaluate the impact of eConsult's replication, this study draws data from eConsult  
22 services in Alberta (AB), Manitoba (MB), Quebec (QC), and Newfoundland and Labrador (NL).  
23  
24 Services in three of these provinces (MB, QC, NL) operate using a platform identical to the  
25 BASE™ model of care, which was first developed in Ottawa, Ontario in 2009. The remaining  
26 province (AB) incorporated an eReferral service with eConsult capabilities similar principles to  
27 the BASE model into its provincial electronic health record, called Alberta Netcare, in 2014.  
28  
29

### 30 *RE-AIM framework*

31  
32 As part of our CIHR-funded activities to explore the factors critical to eConsult's successful  
33 adoption, we utilized the RE-AIM framework to assess eConsult's impact based on five criteria:  
34  
35 1) Reach into the target population; 2) Effectiveness or efficacy; 3) Adoption by target settings,  
36 institutions and staff; 4) Implementation, including its consistency and costs of delivery; and 5)  
37 Maintenance of intervention effects in individuals and settings over time.<sup>(10)</sup> A description of  
38 each criterion and its associated metrics is included in Appendix A.  
39  
40  
41  
42  
43  
44  
45  
46  
47  
48  
49  
50  
51  
52

### 53 *Participants*



This study includes aggregated information from eConsult cases completed in the four participating provincial services.

### *Analysis*

Each participating province contributed data collected by the service. This includes utilization data collected automatically (e.g. specialty group submitted to, response time) and responses to surveys completed at the conclusion of each case. The AB service does not include a closeout survey, so was exempted from metrics that relied on survey data. Data reporting periods varied between provinces out of necessity, as provinces implemented eConsult at different points in time. Where possible, at least one year of data was included. A complete list of data metrics available from each service is presented in Table 1.

**Table 1.** Data available for analysis from each of the four participating services.

| <b>Data Metric</b>                                               | <b>AB</b> | <b>MB</b> | <b>QC</b> | <b>NL</b> |
|------------------------------------------------------------------|-----------|-----------|-----------|-----------|
| <b>Reach</b>                                                     |           |           |           |           |
| Total number of cases completed                                  | X         | X         | X         | X         |
| Number of specialties available                                  | X         | X         | X         | X         |
| Top five most frequently requested specialties                   | X         | X         | X         | X         |
| <b>Effectiveness</b>                                             |           |           |           |           |
| Average specialist response time                                 | X         | X         | X         | X         |
| Proportion of advice on new/additional action                    |           | X         | X         | X         |
| Whether a referral was originally considered/ultimately provided |           | X         | X         | X         |
| PCP satisfaction                                                 |           | X         | X         | X         |
| <b>Adoption</b>                                                  |           |           |           |           |
| Number of PCPs who joined the service                            | X         | X         | X         | X         |
| Number of clinics with participating PCPs                        |           | X         | X         |           |
| Number of cities/towns with participating PCPs                   | X         | X         | X         | X         |
| Number of specialists who joined the service                     |           | X         | X         | X         |
| PCP enrollment by month                                          |           | X         | X         |           |
| Proportion of active PCPs (submitted >= 1 case)                  |           | X         | X         | X         |
| <b>Implementation</b>                                            |           |           |           |           |
| Hosts and Key Partners                                           | X         | X         | X         | X         |
| Platform                                                         | X         | X         | X         | X         |
| Payment model                                                    | X         | X         | X         | X         |
| <b>Maintenance</b>                                               |           |           |           |           |

|                                                                  |   |   |   |   |
|------------------------------------------------------------------|---|---|---|---|
| Number of cases completed over time (e.g. monthly case volume)   | X | X | X | X |
| Number of PCPs who joined the service during the one year period |   | X | X |   |

AB = Alberta; MB = Manitoba; QC = Quebec, NL = Newfoundland and Labrador

## Results

### *Reach*

The reporting period for the study varied between provinces. MB had the shortest reporting period, with data from December 2017 to September 2018, while AB had the longest, with data from August 2014 to July 2018. The total number of cases completed ranged from 96 cases (MB) to 6,885 cases (AB). When expressed as population rates in the first year of implementation, PCPs completed 1.14 eConsults per 1000 people in NL, 0.04 eConsults per 1000 people in Quebec, 0.07 eConsults per 1000 people in Manitoba, and 0.0035 eConsults per 1000 people in Alberta. Data on the number of cases completed, population rates, and providers enrolled is listed in Table 2.

**Table 2.** The data reporting period, number of cases completed, and specialties available for eConsult services across provinces

|                                                                            | Alberta             | Manitoba            | Quebec              | Newfoundland and Labrador |
|----------------------------------------------------------------------------|---------------------|---------------------|---------------------|---------------------------|
| <b>Data reporting period</b>                                               | Jan 2014 – Mar 2018 | Dec 2017 – Sep 2018 | Jul 2017 – Jun 2018 | Sep 2016 – Jul 2018       |
| <b>Total number of cases completed</b>                                     | 4,345               | 96                  | 450                 | 1656                      |
| <b>Total number of cases completed in the first year of implementation</b> | 15                  | 96                  | 334                 | 603                       |
| <b>Population of the province(11)</b>                                      | 4,286,134           | 1,338,109           | 8,394,034           | 528,817                   |
| <b># eConsults/1000 people</b>                                             | 0.0035              | 0.07                | 0.04                | 1.14                      |
| <b>Number of primary care providers enrolled</b>                           | 1,446               | 93                  | 139                 | 191                       |
| <b>Number of specialists</b>                                               |                     | 31                  | 55                  | 56                        |

|                                        |      |    |    |     |
|----------------------------------------|------|----|----|-----|
| <b>enrolled</b>                        |      |    |    |     |
| <b>Number of specialties available</b> | 22   | 25 | 22 | 35  |
| <b>Average response time (days)</b>    | 16.7 | 3  | 4  | 3.5 |

Services offered a range of specialties, with NL offering the greatest variety (n=35), and AB and QC the least (n=22). The most frequently requested groups varied across provinces. Only endocrinology appeared in the top five specialties across all provinces. In MB, the five most frequently requested specialties were dermatology (n=28, 29%), hepatology (n=14, 15%), cardiology (n=13, 14%), hematology (n=8, 8%), and a three-way tie between allergy medicine, endocrinology, and nephrology (n=5, 5%); in QC, they were internal medicine (n=101, 22%), dermatology, (n=82, 19%), obstetrics (n=64, 15%), endocrinology (n=39, 9%), and psychiatry (n=32, 7%); in NL, they were hematology (n=184, 11%), neurology (n=167, 10%), cardiology (n=161, 10%), endocrinology (n=148, 9%), and dermatology (n=142, 9%). AB demonstrated an overwhelming majority of cases to urology (n=6,400, 93%), with the remainder going to gastroenterology (n=122, 2%), nephrology (n=117, 2%), endocrinology (n=73, 1%), and oncology (n=46, 1%). The top ten most frequently referred to specialties across services are displayed in Figure 2.

### ***Effectiveness***

The average specialist response time ranged from 3 days (MB) to 16.7 days (AB). Between 54% (NL) and 66% (MB) of cases resulted in the PCP getting new or additional information to use in their patient's treatment (Figure 3). PCPs avoided completing referrals they had originally considered in 36% (NL) to 53% of cases (MB), while only between 24% (MB) and 29% (NL) of cases resulted in patients still requiring a referral (Figure 4). Furthermore, in a small number of

1  
2  
3 cases (QC, NL: 3%; MB: 1%), PCPs had not originally considered a referral but implemented  
4  
5 one based on specialist advice.  
6

7  
8 Across all services where PCP survey data was collected, PCPs expressed high levels of  
9  
10 satisfaction with the eConsult service. PCPs ranked specialists' responses as high or very high  
11  
12 value for their patients in 96% (QC), 95% (NL), and 96% (MB) of cases (Figure 5).  
13

### 14 ***Adoption***

15  
16 Services from each province varied in scope. As the most recently implemented service  
17  
18 (launched in December 2017), the MB service was also the smallest, with 93 PCPs enrolled  
19  
20 across 18 clinics in 9 municipalities, and 31 practicing specialists. The QC service enrolled 139  
21  
22 PCPs, who practiced in 11 clinics across three different regions (Outaouais, Abitibi, and  
23  
24 Maurice), as well as 55 specialists practicing in 3 specialty clinics. The NL service demonstrated  
25  
26 the broadest scope of adoption among services using the BASE™ model, with 252 enrolled  
27  
28 PCPs practicing in 33 municipalities across the province, and 56 participating specialists. The  
29  
30 AB service was the largest overall, with 1,446 participating PCPs across 46 municipalities. PCP  
31  
32 enrollment over time is presented in Figure 6.  
33  
34  
35  
36

37  
38 Of the 93 PCPs enrolled in the MB service, 32% (n=30) were active users, meaning they  
39  
40 had submitted at least one case. QC demonstrated a similar rate of active users, with 33% (n=44)  
41  
42 of the 135 enrolled PCPs submitting at least one case. NL showed a higher ratio of active users,  
43  
44 with 56% (n=140) of enrolled PCPs deemed active.  
45

### 46 ***Implementation***

47  
48 The implementation strategy for each province varied based on the needs of its population and  
49  
50 the infrastructure already in place. Each service partnered with regional and provincial groups  
51  
52 capable of hosting the service and expanding it to new jurisdictions (Table 3). In MB and NL,  
53  
54  
55  
56  
57  
58  
59  
60

the BASE™ platform was replicated directly and provided as part of CIHR funded grants, following the template laid in the Champlain region and using the same software (Microsoft SharePoint). By contrast, QC adopted the BASE™ model of managed care, but built the service on the Enterprise Telehealth Platform already in operation on the Quebec Healthcare Network in order to leverage existing infrastructure. AB incorporated eConsult into Alberta Netcare, the electronic health record responsible for storing patients' health information province-wide.

Methods for payment vary between provinces. In AB, providers are compensated by submitting fee codes in the same manner as other services, with separate codes and rates established for referring (\$32.43) and responding (\$76.27) providers. In the other provinces, fee codes are either not available (QC, NL) or too low to adequately support the service (MB).

Payment is thus provided through the service, with specialists earning \$200 per hour prorated to the length of time spent answering the case.

**Table 3.** Details on the platform, host organization, and payment models for participating eConsult services.

|                               | <b>Alberta</b>                             | <b>Manitoba</b>                                                                              | <b>Quebec</b>                                                                                                                   | <b>Newfoundland and Labrador</b>                                                                                                                 |
|-------------------------------|--------------------------------------------|----------------------------------------------------------------------------------------------|---------------------------------------------------------------------------------------------------------------------------------|--------------------------------------------------------------------------------------------------------------------------------------------------|
| <b>Hosts and Key Partners</b> | AB Health Services, AB Health              | Shared Health Services Manitoba, eHealth Manitoba, Research Manitoba, University of Manitoba | Télésanté Ruis McGill, Centre Intégré de Santé et de Services Sociaux de l'Outaouais, Collège Québécois des Médecins de Famille | NL Medical Association, Department of Health and Community Services, Memorial University eHealth Research Unit, NL Centre for Health Information |
| <b>Platform</b>               | Orion Health, built within Alberta Netcare | SharePoint                                                                                   | Enterprise Telehealth Platform, built within Quebec Healthcare Network                                                          | SharePoint                                                                                                                                       |

|                      |                                                |                                       |                                       |                                       |
|----------------------|------------------------------------------------|---------------------------------------|---------------------------------------|---------------------------------------|
| <b>Payment model</b> | Fee codes (\$32.43 referral, \$76.27 response) | Through service (\$200/hour prorated) | Through service (\$200/hour prorated) | Through service (\$200/hour prorated) |
|----------------------|------------------------------------------------|---------------------------------------|---------------------------------------|---------------------------------------|

AB = Alberta; MB = Manitoba; NL = Newfoundland and Labrador

The provincial services have engaged in various activities supporting eConsult's implementation in their jurisdictions. In MB, activities included presentations (e.g. Manitoba College of Family Physicians Annual Scientific Assembly, the University of Manitoba Academic Days), publications (e.g. Manitoba College of Family Physician's MCFP E\_News Update, Nine Circles Community Health Centers Annual Report), and outreach to local PCPs and specialists. In QC, activities included outreach to provincial and national organizations (e.g. Quebec College of Family Physicians, Canada Health Infoway), presentation at conferences (e.g. Centre intégré de santé et des services sociaux de l'Outaouais (CISSSCO) Research Day(12)), and publications highlighting eConsult in professional and popular media (e.g. Réseau-1 Québec,(13) CISSSCO newsletter,(14) Le Droit(15)) .

### ***Maintenance***

All participating services demonstrated growth of usage during the study period, though case volumes varied based on the number of users and length of time the service had been established. Monthly case volumes for MB, QC, and NL are shown in Figure 7; given the substantial difference in scale between AB and other services, monthly case volumes for AB are charted separately in Figure 8. In every case, services demonstrated higher rates of usage in their last quarter of data than their first. In NL, the service completed an average of 16.3 cases/month in its first quarter of available data versus 121.7 cases/month in its last quarter. In QC, there were 4.7 cases/month in the first quarter versus 83 cases/month in the last quarter. MB's data spanned less than four full quarters, with 2 cases/month in the first three-month period and 13.6 cases/month

1  
2  
3 in the last. AB completed 2.3 cases/month in its first quarter and 527 cases/month in its last  
4  
5 quarter.  
6

7  
8 The participating services are at different stages of implementation. AB is a fully  
9  
10 sustained service, integrated into the provincial EMR platform and funded directly by the  
11  
12 province. NL has also entered the sustainability phase, with provincial expansion underway. MB  
13  
14 and QC remain regional services at present, though in both cases discussions regarding  
15  
16 provincial expansion and sustainment are ongoing.  
17  
18

### 19 **Discussion**

20  
21 eConsult is a promising technology tool designed to reduce wait times to access specialist  
22  
23 advice. Our findings demonstrated eConsult's spread and scale in four provinces across Canada,  
24  
25 with a growing number of Canadians benefiting from rapid access to specialist advice through  
26  
27 eConsult. The implementation process varied between regions based on existing services, local  
28  
29 needs, and clinical champions, allowing us to take a tailored approach that fit each community.  
30  
31 However, once implementation began, the services demonstrated a common pattern of growth,  
32  
33 reported similar response times and case outcomes, and delivered similarly high levels of  
34  
35 provider satisfaction. Using the RE-AIM framework allowed us to paint a broad comparative  
36  
37 picture of the service in each region.  
38  
39  
40  
41

42  
43 Barriers to spread and scale have limited the adoption of many promising healthcare  
44  
45 innovations. Canada has a reputation of being a “land of perpetual pilot projects,” where  
46  
47 programs are regularly initiated but often fail to expand or sustain themselves beyond their initial  
48  
49 implementation period.(5;6) In their 2015 report, Naylor et al. highlight several barriers to an  
50  
51 innovation's spread, including a lack of funding tailored to scaling up pilots, too little focus on  
52  
53  
54  
55  
56  
57  
58  
59  
60

1  
2  
3 patient-centred care, aversion to deploying digital technology, and a fragmented healthcare  
4  
5 system that inadvertently promotes regional siloing.(6)  
6

7  
8 Our team has worked to overcome these barriers through strong and fruitful partnerships  
9  
10 with provincial and national organizations. These groups can provide vital sources for funding,  
11  
12 and support interjurisdictional coordination and knowledge sharing to ensure successful ideas do  
13  
14 not get lost, but have the opportunity to be tested and replicated in new environments. The CFHI  
15  
16 Connected Medicine Collaborative, cited in the introduction of this paper, is a good example.  
17  
18 Launched in 2015, the program has led to the successful implementation of 11 programs across 7  
19  
20 provinces.(8) Much of its success stemmed from taking programs that had demonstrated  
21  
22 effectiveness along key metrics, and allowing motivated groups in other provinces to replicate  
23  
24 them while drawing on the expertise of previous implementers. Beyond the Collaborative, our  
25  
26 team has endeavored to promote knowledge-sharing through our Think Tank and National  
27  
28 Forum, annual events that draw clinicians, patients, and decision-makers from across Canada to  
29  
30 discuss issues pertinent to eConsult's expansion.(16) The third meeting was held in November  
31  
32 2018, with a focus on developing best practices to support the spread of eConsult and eReferral  
33  
34 nation-wide. Patient partners have consistently been well-represented at these events, reflecting  
35  
36 our team's commitment to maintaining a patient-centered approach to care.  
37  
38  
39  
40  
41

42 Some factors, such as the number of cases completed, PCPs enrolled, and specialty  
43  
44 services available, varied substantially between provinces, and are reflected in the provincial  
45  
46 population rates of completed eConsults per 1,000 people during the first year of  
47  
48 implementation. These variations are to be expected, given differences in implementation  
49  
50 strategy, local needs and provider availability, scope, and the fact that some services had been  
51  
52 implemented for a longer period than others—for instance, the AB service included cases from  
53  
54  
55  
56  
57  
58  
59  
60



1  
2  
3 August 2014 to July 2018, while the MB service was first launched in December 2017 and thus  
4 could only report cases over a 10-month period. The population rates observed in the present  
5 study ranged from 0.0035 to 1.14 eConsults per 1000 people. In the cases of MB, QC, and NL,  
6 this level of usage exceeds that exhibited in the service's first year in the Champlain region (0.16  
7 eConsults per 1,000 people) and the Mississauga Halton region (0.36 eConsults per 1,000  
8 people).<sup>(7)</sup> This increased uptake likely stems from the fact that these services were able to build  
9 on an established model of care, and leverage the network of support originally generated in  
10 Ontario. AB is the outlier in this regard, as it showed an irregular pattern of usage growth  
11 reflecting its origins as an eReferral platform on which eConsult capabilities were only fully  
12 utilized after several years of implementation. Furthermore, it is worth noting that the AB service  
13 was implemented within a pre-established platform (i.e. Netcare) that already had a substantial  
14 user base in the province. As such, recruitment was less burdensome, as it entailed getting PCPs  
15 to use a new function within a familiar platform, rather than encouraging them to learn an  
16 entirely new application, which potentially explains the rapid growth in usage in 2017 when the  
17 service's eConsult capabilities were first emphasized.

18  
19  
20  
21  
22  
23  
24  
25  
26  
27  
28  
29  
30  
31  
32  
33  
34  
35  
36  
37  
38 More consistency between provinces was seen in PCPs' responses to closeout surveys  
39 among the three services where these surveys were used (MB, QC, NL), particularly between  
40 QC and NL. MB demonstrated results that varied from the other two provinces, likely due to QC  
41 and NL having a larger number of completed cases, (450 and 1,656, respectively), allowing for a  
42 more robust sample. This assumption is supported by the latest numbers reported by the  
43 Champlain BASE™ eConsult service. In a recent study assessing 14,105 Champlain BASE  
44 eConsult cases completed over a five-year period, PCPs' survey responses closely aligned with  
45 those from the QC and NL services: PCPs reported new/additional advice in 57% of cases  
46  
47  
48  
49  
50  
51  
52  
53  
54  
55  
56  
57  
58  
59  
60

1  
2  
3 (versus 58% in QC and 54% in NL), and 32% of cases resulted in a face-to-face referral (versus  
4  
5 27% in QC and 29% in NL).(4) Given time, we anticipate that survey responses for the MB  
6  
7 service will draw closer to this range.  
8  
9

10 The main strength of this study is the breadth of its data, which spans four provinces and  
11 multiple regions. By collating measures of eConsult's impact across multiple jurisdiction, our  
12 findings make a strong case for eConsult's generalizability and scalability. However, our study  
13 also has several limitations. The data included was observational and clinician based, which does  
14 not allow for a direct patient perspective. Differences in service structure and data collection  
15 meant some metrics could not be captured across all participating services.  
16  
17  
18  
19  
20  
21  
22  
23

## 24 **Conclusion**

25  
26 The eConsult service has been successfully implemented in four new provinces across Canada,  
27 three using the BASE™ model (MB, QC, NL) and one incorporating eConsult capabilities into  
28 an existing eReferral platform (AB). Implementation strategies and scope varied, but services  
29 demonstrated substantial consistency on several key metrics, most notably case outcomes.  
30  
31  
32  
33

## 34 **Acknowledgements**

35  
36 The authors wish to thank the PCPs and specialists who use the service, and Justin Joschko for  
37 his assistance in editing the manuscript and preparing it for publication.  
38  
39  
40  
41

## 42 **Contributor details**

43  
44 CL and EK conceived of and designed the study, and contributed to the data analysis and  
45 drafting of the publication. AB, JC, MDP, GF, LI, LO, RM, VN, and AS contributed data to the  
46 study and were involved with its conception, conduct, analysis, and reporting. ND contributed to  
47 its data analysis. All authors helped write and edit the manuscript, and approved the final draft.  
48  
49  
50  
51  
52

## 53 **Funding**

1  
2  
3 Funding for this project was provided through the Canadian Institutes of Health Research. The  
4 authors affirm their independence from these funders. The funders played no part in the study  
5 design, collection, analysis, or interpretation of the data, in the writing of the report, or in the  
6 decision to submit the article for publication. All authors had full access to all the data in the  
7 study and can take responsibility for the integrity of the data and the accuracy of the data  
8 analysis.  
9

### 16 **Competing interest declaration**

17 All authors have completed the ICMJE uniform disclosure form at  
18 [www.icmje.org/coi\\_disclosure.pdf](http://www.icmje.org/coi_disclosure.pdf) and declare: no support from any organisation for the  
19 submitted work; no financial relationships with any organisations that might have an interest in  
20 the submitted work in the previous three years; no other relationships or activities that could  
21 appear to have influenced the submitted work.  
22  
23  
24  
25  
26  
27  
28  
29

### 30 **Ethics approval**

31 This study was approved by the Ottawa Health Science Network Research Ethics Board  
32 (Protocol # 2009848-01H).  
33  
34  
35  
36

### 37 **Data sharing**

38 Data from the study is available from the corresponding author upon reasonable request.  
39

### 40 **Transparency declaration**

41 The lead author, CL, affirms that the manuscript is an honest, accurate, and transparent account  
42 of the study being reported; that no important aspects of the study have been omitted; and that  
43 any discrepancies from the study as planned (and, if relevant, registered) have been explained.  
44  
45  
46  
47  
48  
49

50 All authors had full access to the data and can take responsibility for the integrity of the data and  
51 the accuracy of the analysis.  
52  
53  
54  
55  
56  
57  
58  
59  
60

### Copyright/licence for publication

The Corresponding Author has the right to grant on behalf of all authors and does grant on behalf of all authors, a worldwide licence to the Publishers and its licensees in perpetuity, in all forms, formats and media (whether known now or created in the future), to i) publish, reproduce, distribute, display and store the Contribution, ii) translate the Contribution into other languages, create adaptations, reprints, include within collections and create summaries, extracts and/or, abstracts of the Contribution, iii) create any other derivative work(s) based on the Contribution, iv) to exploit all subsidiary rights in the Contribution, v) the inclusion of electronic links from the Contribution to third party material where-ever it may be located; and, vi) licence any third party to do any or all of the above.

## References

- 1) Canadian Institute for Health Information. *How Canada Compares: Results From The Commonwealth Fund's 2016 International Health Policy Survey of Adults in 11 Countries*. Ottawa: Canadian Institute for Health Information; 2012.  
<https://www.cihi.ca/sites/default/files/document/text-alternative-version-2016-cmwf-en-web.pdf>, 14 July, 2017
- 2) Canadian Intitute for Health Information. *Health Care in Canada, 2012: A Focus on Wait Times*. Ottawa: Canadian Institute for Health Information; 2012.  
[https://secure.cihi.ca/free\\_products/HCIC2012-FullReport-ENweb.pdf](https://secure.cihi.ca/free_products/HCIC2012-FullReport-ENweb.pdf), 14 July, 2017
- 3) Barua B, Esmail N. *Waiting Your Turn: Wait Times for Health Care in Canada*. Vancouver: Fraser Institute; 2013. <http://www.fraserinstitute.org/uploadedFiles/fraser-ca/Content/research-news/research/publications/waiting-your-turn-2013.pdf>, 14 July, 2017
- 4) Liddy C, Moroz I, Afkham A, Keely E. Sustainability of a primary care driven eConsult service. *Annals Of Family Medicine* 2018;16(2):120-8.
- 5) Bégin HM, Eggertson L, Macdonald N. A country of perpetual pilot projects. *Canadian Medical Association Journal* 2009;180(12):1185.
- 6) Naylor D, Girard F, Mintz JM, Fraser N, Jenkins T, Power C, et al. *Unleashing Innovation: Excellent Healthcare for Canada: Report of the Advisory Panel on Healthcare Innovation*. Ottawa, ON: Government of Canada; 2015.
- 7) Liddy C, Moroz I, Afkham A, Keely E. Evaluating the Implementation of The Champlain BASE eConsult Service in a New Region of Ontario, Canada: A Cross-Sectional Study. *Healthcare Policy* 2017;13(2):79-95.

- 1  
2  
3 8) Canadian Foundation for Healthcare Improvement. Connected Medicine: Enhancing  
4 Access to Specialist Consult e-Collaborative (Access to Specialist Consult).  
5  
6 <http://www.cfhi-fcass.ca/WhatWeDo/access> 12 October ,2018  
7  
8
- 9  
10 9) Canadian Foundation for Healthcare Improvement. Connected Medicine.  
11  
12 <https://www.cfhi-fcass.ca/WhatWeDo/connected-medicine> 12 October, 2018  
13
- 14 10) Glasgow RE, Vogt TM, Boles SM. Evaluating the public health impact of health  
15 promotion interventions: the RE-AIM framework. Am J Public Health 1999  
16 Sep;89(9):1322-7.  
17  
18
- 19 11) Statistics Canada. Canada at a Glance 2018: Population.  
20  
21 <https://www150.statcan.gc.ca/n1/pub/12-581-x/2018000/pop-eng.htm> 14 December, 2018  
22  
23
- 24 12) Nabelsi V, Lévesque-Chouinard A, Roy M-C. Projet BASE™ eConsult Québec. Centre  
25 Intégré de santé et de services sociaux de l'Outaouais; 2018. [https://ciiss-](https://ciiss-outaouais.gouv.qc.ca/wp-content/uploads/2018/06/R%C3%A9sum%C3%A9s-affiches.pdf)  
26 [outaouais.gouv.qc.ca/wp-content/uploads/2018/06/R%C3%A9sum%C3%A9s-](https://ciiss-outaouais.gouv.qc.ca/wp-content/uploads/2018/06/R%C3%A9sum%C3%A9s-affiches.pdf)  
27 [affiches.pdf](https://ciiss-outaouais.gouv.qc.ca/wp-content/uploads/2018/06/R%C3%A9sum%C3%A9s-affiches.pdf) 4 December, 2018.  
28  
29  
30  
31  
32
- 33 13) Réseau-1 Québec. Scaling-up eConsult in Primary Health Care: a policy analysis in four  
34 Canadian provinces. [http://reseau1quebec.ca/projets-isspli/scaling-up-econsult-in-](http://reseau1quebec.ca/projets-isspli/scaling-up-econsult-in-primary-health-care-a-policy-analysis-in-four-canadian-provinces/)  
35 [primary-health-care-a-policy-analysis-in-four-canadian-provinces/](http://reseau1quebec.ca/projets-isspli/scaling-up-econsult-in-primary-health-care-a-policy-analysis-in-four-canadian-provinces/) 4 December, 2018.  
36  
37  
38  
39
- 40 14) Centre intégré de santé et de services sociaux de l'Outaouais. « eConsult Québec » : à un  
41 clic d'un médecin spécialiste! [https://ciiss-outaouais.gouv.qc.ca/wp-](https://ciiss-outaouais.gouv.qc.ca/wp-content/uploads/2018/04/Bulletin-Au-fil-5-avril-2018-n61-3.pdf)  
42 [content/uploads/2018/04/Bulletin-Au-fil-5-avril-2018-n61-3.pdf](https://ciiss-outaouais.gouv.qc.ca/wp-content/uploads/2018/04/Bulletin-Au-fil-5-avril-2018-n61-3.pdf) 4 December, 2018.  
43  
44  
45  
46  
47  
48
- 49 15) Mercier J. Un spécialiste en quelques clics. [https://www.ledroit.com/actualites/sante/un-](https://www.ledroit.com/actualites/sante/un-specialiste-en-quelques-clics-746477a18b3b98b227809525af6f6e6e)  
50 [specialiste-en-quelques-clics-746477a18b3b98b227809525af6f6e6e](https://www.ledroit.com/actualites/sante/un-specialiste-en-quelques-clics-746477a18b3b98b227809525af6f6e6e) 4 December, 2018.  
51  
52  
53  
54  
55  
56  
57  
58  
59  
60

- 1  
2  
3 16) Liddy C, Moroz I, Joschko J, Horsley T, Kuziemy C, Kovacs Burns K, et al. Using an  
4  
5 integrated knowledge translation (IKT) approach to enable policy change for electronic  
6  
7 consultations in Canada. Healthcare Policy 2018;14(1):19-29  
8  
9  
10  
11  
12  
13  
14  
15  
16  
17  
18  
19  
20  
21  
22  
23  
24  
25  
26  
27  
28  
29  
30  
31  
32  
33  
34  
35  
36  
37  
38  
39  
40  
41  
42  
43  
44  
45  
46  
47  
48  
49  
50  
51  
52  
53  
54  
55  
56  
57  
58  
59  
60

For peer review only

## Figure Legends

**Figure 1.** Timeline of the Canadian Foundation for Healthcare Improvement's two-phase Connected Medicine Collaborative

**Figure 2.** The top ten most frequently requested specialties across services

AB = Alberta; MB = Manitoba; QC = Quebec, NL = Newfoundland and Labrador

**Figure 3.** Which of the following best describes the outcome of this eConsult for your patient?

QC = Quebec, NL = Newfoundland and Labrador

**Figure 4.** Impact of eConsult on referral based on PCP response to closeout survey

QC = Quebec, NL = Newfoundland and Labrador, MB = Manitoba

**Figure 5.** Primary care provider-reported value of eConsult for their patients on a 5-point Likert scale

QC = Quebec, NL = Newfoundland and Labrador, MB = Manitoba

**Figure 6.** PCP enrollment in eConsult services by month

**Figure 7.** Monthly case volume of eConsult by province for Newfoundland and Labrador, Quebec, and Manitoba

**Figure 8.** Monthly case volume of eConsult in Alberta (Newfoundland and Labrador, Quebec, and Manitoba services included for scale)



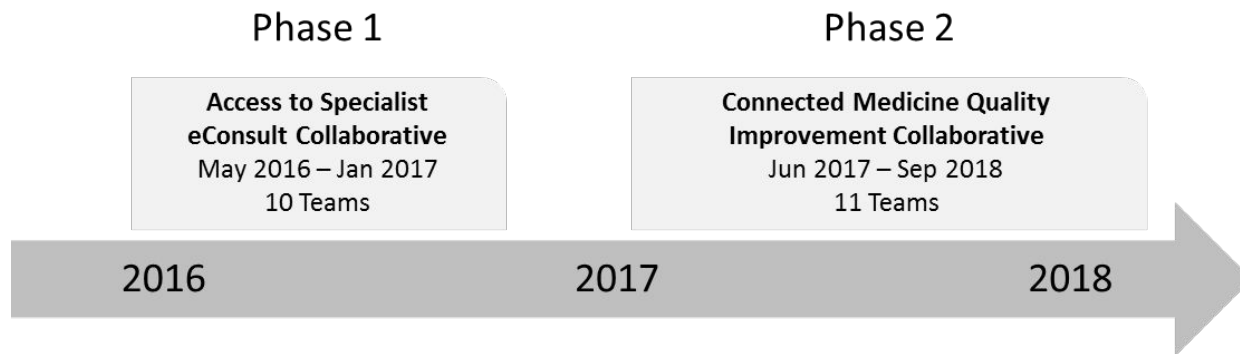

**Figure 1.** Timeline of the Canadian Foundation for Healthcare Improvement’s two-phase Connected Medicine Collaborative

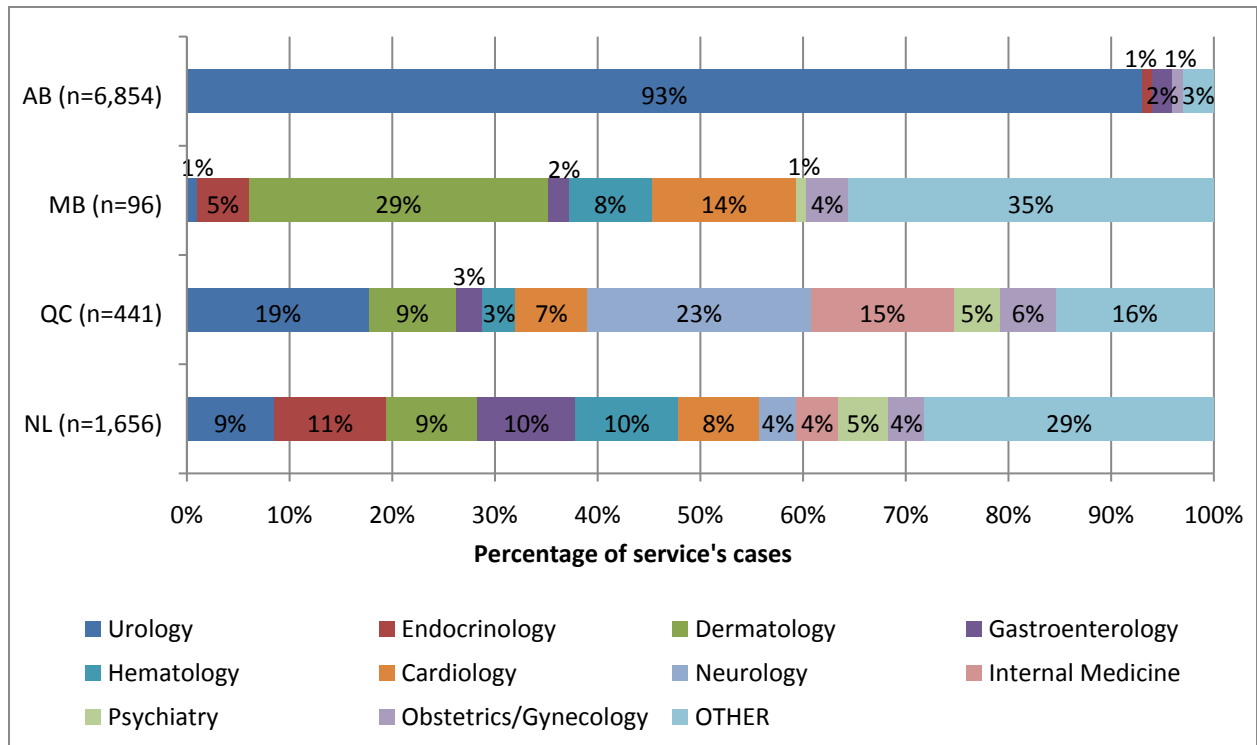

**Figure 2.** The top ten most frequently requested specialties across services  
 AB = Alberta; MB = Manitoba; QC = Quebec, NL = Newfoundland and Labrador

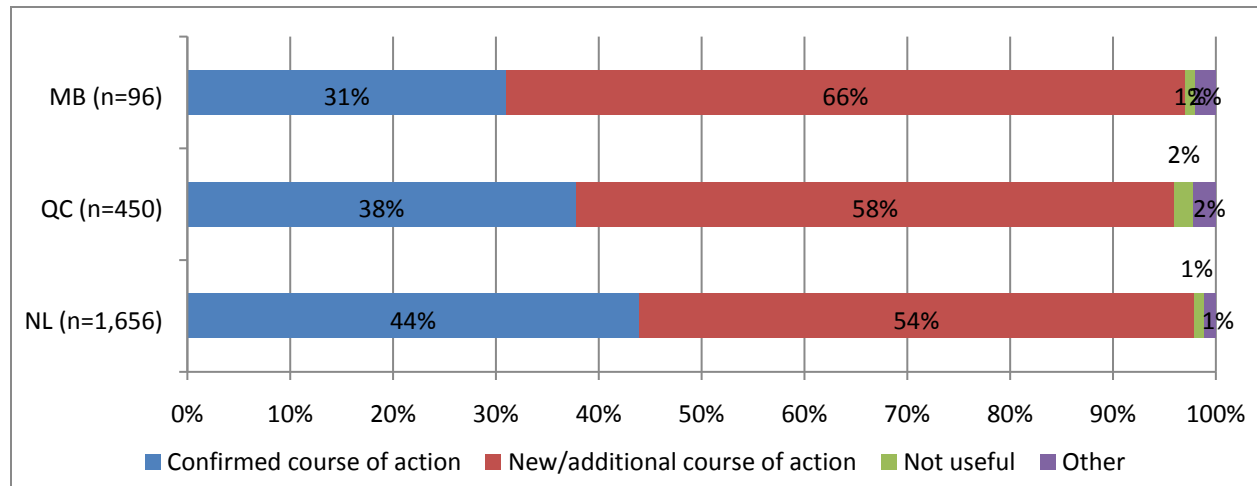

**Figure 3.** Which of the following best describes the outcome of this eConsult for your patient?  
QC = Quebec, NL = Newfoundland and Labrador

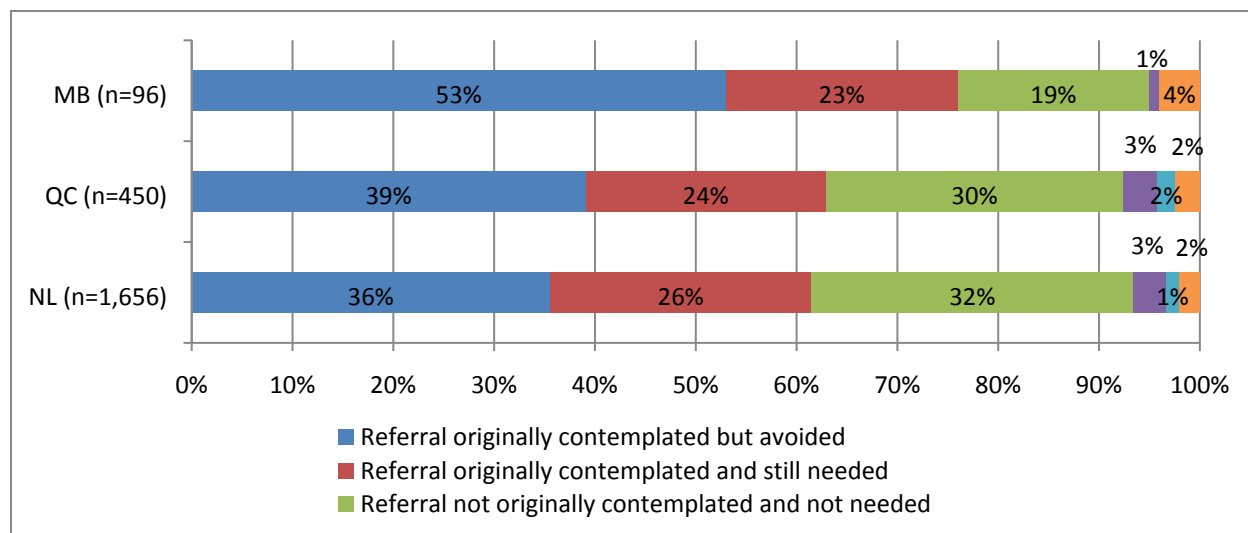

**Figure 4.** Impact of eConsult on referral based on PCP response to closeout survey  
 QC = Quebec, NL = Newfoundland and Labrador, MB = Manitoba

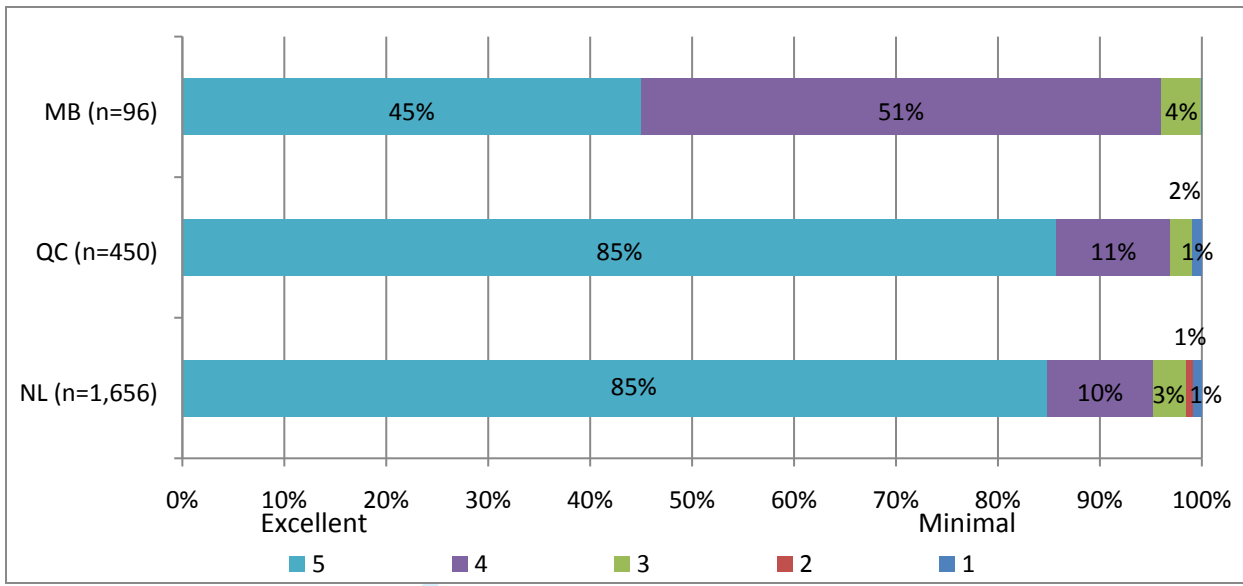

**Figure 5.** Primary care provider-reported value of eConsult for their patients on a 5-point Likert scale  
QC = Quebec, NL = Newfoundland and Labrador, MB = Manitoba

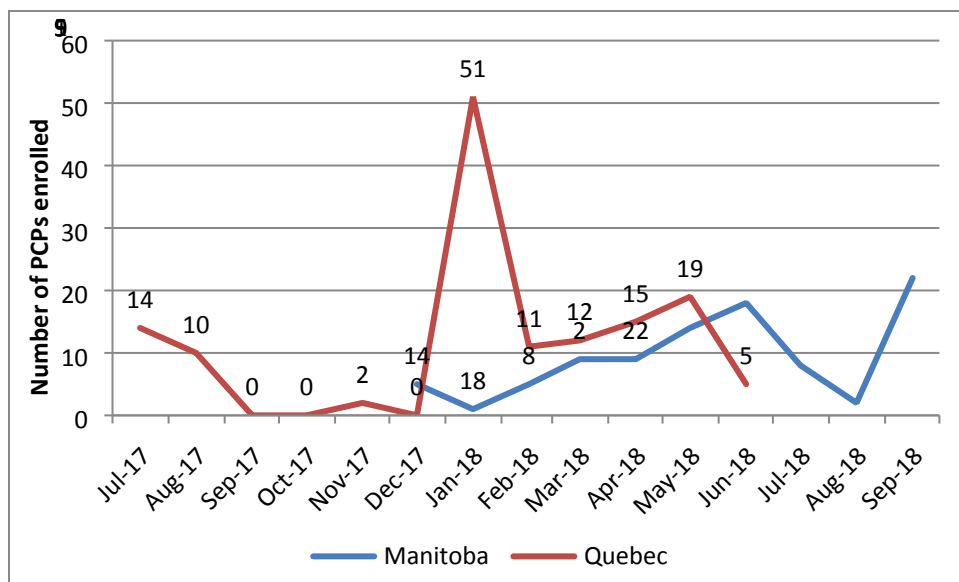

Figure 6. PCP enrollment in eConsult services by month

Peer review only

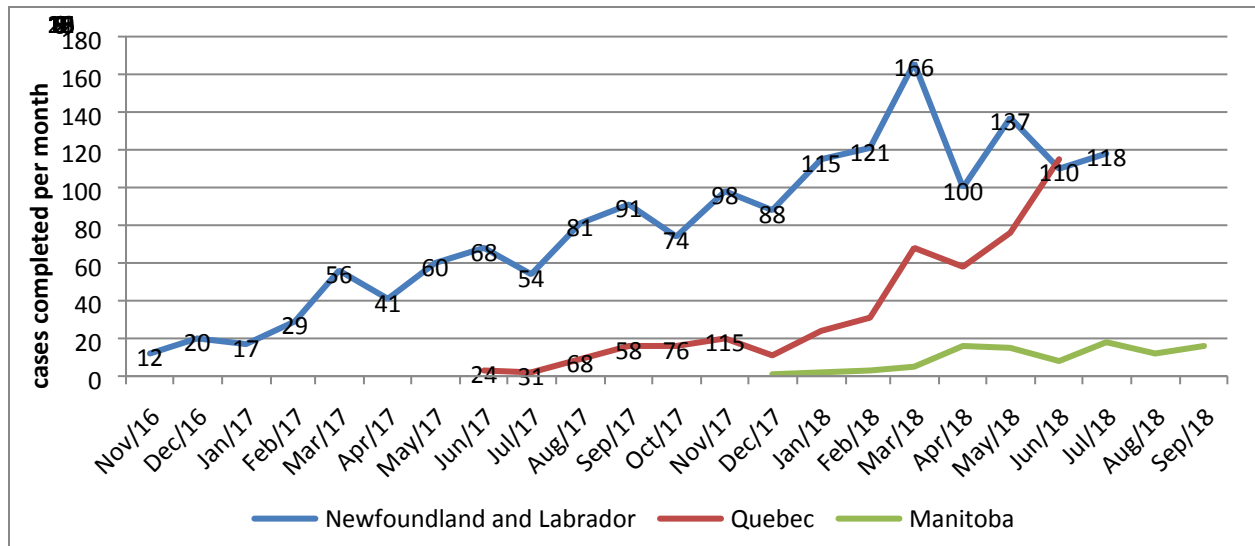

**Figure 7.** Monthly case volume of eConsult by province for Newfoundland and Labrador, Quebec, and Manitoba

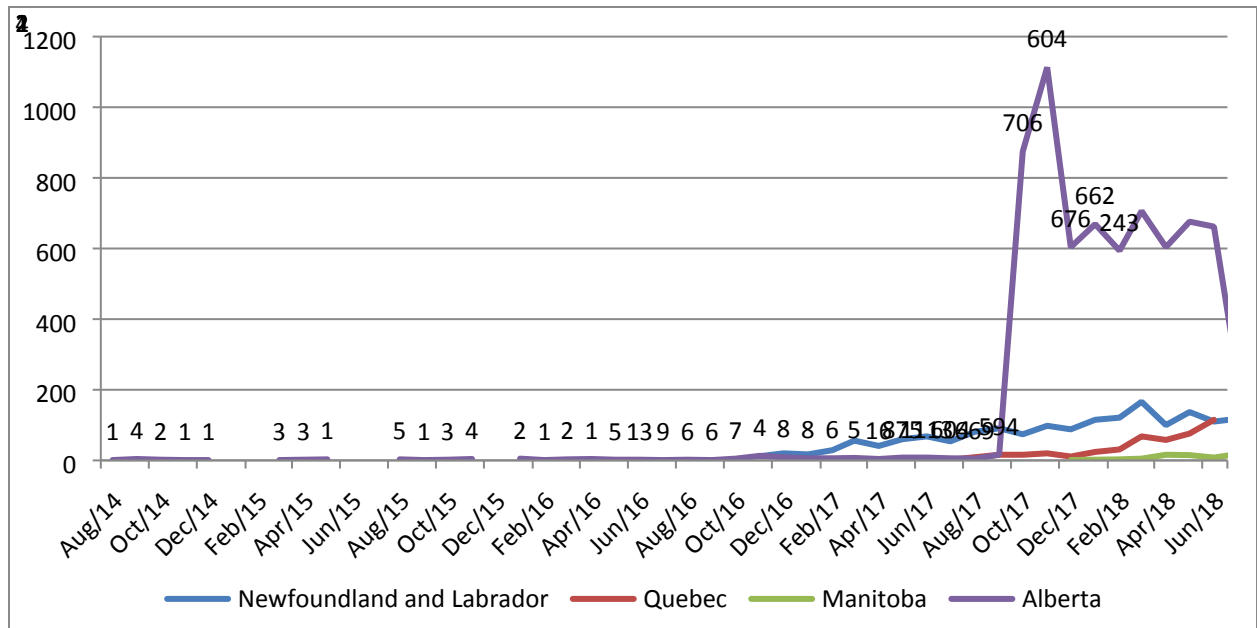

**Figure 8.** Monthly case volume of eConsult in Alberta (Newfoundland and Labrador, Quebec, and Manitoba services included for scale)



**Appendix A.** A description of the five dimensions of care outlined by the RE-Aim framework

| RE-AIM Dimension                                                                 | Definition                                                                                                                                                          | Metrics requested                                                                                                                                                                                                                                                                                                                                                                     |
|----------------------------------------------------------------------------------|---------------------------------------------------------------------------------------------------------------------------------------------------------------------|---------------------------------------------------------------------------------------------------------------------------------------------------------------------------------------------------------------------------------------------------------------------------------------------------------------------------------------------------------------------------------------|
| <b>Reach</b> into the target population                                          | The absolute number, proportion, and representativeness of individuals who are willing to participate in a given initiative, intervention, or program.              | <ul style="list-style-type: none"> <li>• Total number of cases completed:</li> <li>• Number of specialties available</li> <li>• Distribution of cases across specialties (i.e. how many cases went to each specialty)</li> </ul>                                                                                                                                                      |
| <b>Effectiveness</b> or efficacy                                                 | The impact of an intervention on important outcomes, including potential negative effects, quality of life, and economic outcomes.                                  | <ul style="list-style-type: none"> <li>• Number of days between a case being submitted and a specialist responding (median and 75 percentile)</li> <li>• Proportion of advice on new/additional action (survey Q1)</li> <li>• Whether a referral was originally considered and/or ultimately provided (response to survey Q2)</li> </ul>                                              |
| <b>Adoption</b> by target settings, institutions and staff                       | The absolute number, proportion, and representativeness of settings and intervention agents (people who deliver the program) who are willing to initiate a program. | <ul style="list-style-type: none"> <li>• Number of PCPs who joined the service</li> <li>• Proportion of PCPs who submitted <math>\geq 1</math> case</li> <li>• Number of clinics with participating PCPs</li> <li>• Number of cities/towns with participating PCPs</li> <li>• Number of specialists who joined the service</li> <li>• Number of specialty groups available</li> </ul> |
| <b>Implementation</b> consistency, costs and adaptations made during delivery    | The consistency and fidelity to the program protocol, the costs and adaptations made during delivery.                                                               | <ul style="list-style-type: none"> <li>• Steps taken to facilitate replication of eConsult in new jurisdiction (e.g. establishing partnerships, addressing privacy issues, physician engagement, and payment)</li> </ul>                                                                                                                                                              |
| <b>Maintenance</b> of intervention effects in individuals and settings over time | The extent to which a program or policy becomes institutionalized or part of the routine organizational practices and policies.                                     | <ul style="list-style-type: none"> <li>• Number of cases completed over time (e.g. monthly case volume)</li> <li>• Number of PCPs who joined the service during the one year period</li> <li>• Evidence of sustainment and expansion (e.g. funding, new partnerships)</li> </ul>                                                                                                      |

STROBE Statement—Checklist of items that should be included in reports of *cross-sectional studies*

|                           | Item No | Recommendation                                                                                                                                                                                               | Page    |
|---------------------------|---------|--------------------------------------------------------------------------------------------------------------------------------------------------------------------------------------------------------------|---------|
| <b>Title and abstract</b> | 1       | (a) Indicate the study's design with a commonly used term in the title or the abstract                                                                                                                       | 1       |
|                           |         | (b) Provide in the abstract an informative and balanced summary of what was done and what was found                                                                                                          | 2-3     |
| <b>Introduction</b>       |         |                                                                                                                                                                                                              |         |
| Background/rationale      | 2       | Explain the scientific background and rationale for the investigation being reported                                                                                                                         | 4-5     |
| Objectives                | 3       | State specific objectives, including any prespecified hypotheses                                                                                                                                             | 6       |
| <b>Methods</b>            |         |                                                                                                                                                                                                              |         |
| Study design              | 4       | Present key elements of study design early in the paper                                                                                                                                                      | 6       |
| Setting                   | 5       | Describe the setting, locations, and relevant dates, including periods of recruitment, exposure, follow-up, and data collection                                                                              | 6       |
| Participants              | 6       | (a) Give the eligibility criteria, and the sources and methods of selection of participants                                                                                                                  | 7       |
| Variables                 | 7       | Clearly define all outcomes, exposures, predictors, potential confounders, and effect modifiers. Give diagnostic criteria, if applicable                                                                     | 7       |
| Data sources/measurement  | 8*      | For each variable of interest, give sources of data and details of methods of assessment (measurement). Describe comparability of assessment methods if there is more than one group                         | 7       |
| Bias                      | 9       | Describe any efforts to address potential sources of bias                                                                                                                                                    | n/a     |
| Study size                | 10      | Explain how the study size was arrived at                                                                                                                                                                    | 7       |
| Quantitative variables    | 11      | Explain how quantitative variables were handled in the analyses. If applicable, describe which groupings were chosen and why                                                                                 | n/a     |
| Statistical methods       | 12      | (a) Describe all statistical methods, including those used to control for confounding                                                                                                                        | 7       |
|                           |         | (b) Describe any methods used to examine subgroups and interactions                                                                                                                                          | n/a     |
|                           |         | (c) Explain how missing data were addressed                                                                                                                                                                  | 7       |
|                           |         | (d) If applicable, describe analytical methods taking account of sampling strategy                                                                                                                           | n/a     |
|                           |         | (e) Describe any sensitivity analyses                                                                                                                                                                        | n/a     |
| <b>Results</b>            |         |                                                                                                                                                                                                              |         |
| Participants              | 13*     | (a) Report numbers of individuals at each stage of study—eg numbers potentially eligible, examined for eligibility, confirmed eligible, included in the study, completing follow-up, and analysed            | 8       |
|                           |         | (b) Give reasons for non-participation at each stage                                                                                                                                                         | n/a     |
|                           |         | (c) Consider use of a flow diagram                                                                                                                                                                           | n/a     |
| Descriptive data          | 14*     | (a) Give characteristics of study participants (eg demographic, clinical, social) and information on exposures and potential confounders                                                                     | 9       |
|                           |         | (b) Indicate number of participants with missing data for each variable of interest                                                                                                                          | Table 1 |
| Outcome data              | 15*     | Report numbers of outcome events or summary measures                                                                                                                                                         | 9-12    |
| Main results              | 16      | (a) Give unadjusted estimates and, if applicable, confounder-adjusted estimates and their precision (eg, 95% confidence interval). Make clear which confounders were adjusted for and why they were included | 9-12    |

1  
2  
3  
4  
5  
6  
7  
8  
9  
10  
11  
12  
13  
14  
15  
16  
17  
18  
19  
20  
21  
22  
23  
24  
25  
26  
27  
28  
29  
30  
31  
32  
33  
34  
35  
36  
37  
38  
39  
40  
41  
42  
43  
44  
45  
46  
47  
48  
49  
50  
51  
52  
53  
54  
55  
56  
57  
58  
59  
60

|                          |    |                                                                                                                                                                            |      |
|--------------------------|----|----------------------------------------------------------------------------------------------------------------------------------------------------------------------------|------|
|                          |    | (b) Report category boundaries when continuous variables were categorized                                                                                                  | n/a  |
|                          |    | (c) If relevant, consider translating estimates of relative risk into absolute risk for a meaningful time period                                                           | n/a  |
| Other analyses           | 17 | Report other analyses done—eg analyses of subgroups and interactions, and sensitivity analyses                                                                             | 9-12 |
| <b>Discussion</b>        |    |                                                                                                                                                                            |      |
| Key results              | 18 | Summarise key results with reference to study objectives                                                                                                                   | 13   |
| Limitations              | 19 | Discuss limitations of the study, taking into account sources of potential bias or imprecision. Discuss both direction and magnitude of any potential bias                 | 15   |
| Interpretation           | 20 | Give a cautious overall interpretation of results considering objectives, limitations, multiplicity of analyses, results from similar studies, and other relevant evidence | 15   |
| Generalisability         | 21 | Discuss the generalisability (external validity) of the study results                                                                                                      | 15   |
| <b>Other information</b> |    |                                                                                                                                                                            |      |
| Funding                  | 22 | Give the source of funding and the role of the funders for the present study and, if applicable, for the original study on which the present article is based              | 16   |

\*Give information separately for exposed and unexposed groups.

**Note:** An Explanation and Elaboration article discusses each checklist item and gives methodological background and published examples of transparent reporting. The STROBE checklist is best used in conjunction with this article (freely available on the Web sites of PLoS Medicine at <http://www.plosmedicine.org/>, Annals of Internal Medicine at <http://www.annals.org/>, and Epidemiology at <http://www.epidem.com/>). Information on the STROBE Initiative is available at [www.strobe-statement.org](http://www.strobe-statement.org).

# BMJ Open

## Supporting the Spread and Scale-up of eConsult across Canada: a cross-sectional analysis

|                                 |                                                                                                                                                                                                                                                                                                                                                                                                                                                                                                                                                                                                                                                                                                                                                                                                                                                                                        |
|---------------------------------|----------------------------------------------------------------------------------------------------------------------------------------------------------------------------------------------------------------------------------------------------------------------------------------------------------------------------------------------------------------------------------------------------------------------------------------------------------------------------------------------------------------------------------------------------------------------------------------------------------------------------------------------------------------------------------------------------------------------------------------------------------------------------------------------------------------------------------------------------------------------------------------|
| Journal:                        | <i>BMJ Open</i>                                                                                                                                                                                                                                                                                                                                                                                                                                                                                                                                                                                                                                                                                                                                                                                                                                                                        |
| Manuscript ID                   | bmjopen-2018-028888.R1                                                                                                                                                                                                                                                                                                                                                                                                                                                                                                                                                                                                                                                                                                                                                                                                                                                                 |
| Article Type:                   | Research                                                                                                                                                                                                                                                                                                                                                                                                                                                                                                                                                                                                                                                                                                                                                                                                                                                                               |
| Date Submitted by the Author:   | 26-Feb-2019                                                                                                                                                                                                                                                                                                                                                                                                                                                                                                                                                                                                                                                                                                                                                                                                                                                                            |
| Complete List of Authors:       | Liddy, Clare; Elisabeth Bruyere Research Institute, C.T. Lamont Primary Health Care<br>Bello, A; University of Alberta, Edmonton, Alberta, Canada. , Medicine<br>Cook, Jean; Newfoundland and Labrador Medical Association<br>Drimer, Neil; Canadian Foundation for Healthcare Improvement<br>Dumas Pilon, Maxine; McGill University, Family Medicine<br>Farrell, Gerard; Memorial University of Newfoundland, Family Medicine<br>Glassford, Jodi; Alberta Health Services<br>Ireland, Laurie; Nine Circles Community Health Centre<br>McDonald, Rana; Nine Circles Community Health Centre<br>Nabelsi, Véronique; Université du Quebec<br>Oppenheimer, Luis; University of Manitoba, Surgery<br>Singer , Alexander; University of Manitoba College of Medicine, Department of Family Medicine ; Manitoba Primary Care Research Network<br>Keely, Erin; University of Ottawa, Medicine |
| <b>Primary Subject Heading</b>: | General practice / Family practice                                                                                                                                                                                                                                                                                                                                                                                                                                                                                                                                                                                                                                                                                                                                                                                                                                                     |
| Secondary Subject Heading:      | Health policy                                                                                                                                                                                                                                                                                                                                                                                                                                                                                                                                                                                                                                                                                                                                                                                                                                                                          |
| Keywords:                       | PRIMARY CARE, eConsult, Referral, Access to care, Wait times                                                                                                                                                                                                                                                                                                                                                                                                                                                                                                                                                                                                                                                                                                                                                                                                                           |
|                                 |                                                                                                                                                                                                                                                                                                                                                                                                                                                                                                                                                                                                                                                                                                                                                                                                                                                                                        |

SCHOLARONE™  
Manuscripts

## Supporting the Spread and Scale-up of eConsult across Canada: a cross-sectional analysis

Clare Liddy, MD, MSc, CCFP, FCFP<sup>1,2</sup> [cliddy@bruyere.org](mailto:cliddy@bruyere.org)  
Aminu Bello, MD, PhD, FRCP, FACP, FASN<sup>3</sup> [aminu1@ualberta.ca](mailto:aminu1@ualberta.ca)  
Jean Cook<sup>4</sup> [JCook@nlma.nl.ca](mailto:JCook@nlma.nl.ca)  
Neil Drimer, MHSc, CHE<sup>5</sup> [Neil.Drimer@cfhi-fcass.ca](mailto:Neil.Drimer@cfhi-fcass.ca)  
Maxine Dumas Pilon, MD<sup>6</sup> [maxine.dumaspilon@mcgill.ca](mailto:maxine.dumaspilon@mcgill.ca)  
Gerard Farrell, MD<sup>7</sup> [gfarrell@mun.ca](mailto:gfarrell@mun.ca)  
Jodi Glassford<sup>8</sup> [Jodi.Glassford@ahs.ca](mailto:Jodi.Glassford@ahs.ca)  
Laurie Ireland, MD, CCFP<sup>9</sup> [Lireland@ninescircles.ca](mailto:Lireland@ninescircles.ca)  
Rana McDonald, MA<sup>9</sup> [RMcDonald@ninescircles.ca](mailto:RMcDonald@ninescircles.ca)  
Véronique Nabelsi, MScA, PhD<sup>10</sup> [veronique.nabelsi@uqo.ca](mailto:veronique.nabelsi@uqo.ca)  
Luis Oppenheimer, MD, PhD, FRCS(C), FACS, CCFP(hon.)<sup>11</sup> [loppenheimer@hsc.mb.ca](mailto:loppenheimer@hsc.mb.ca)  
Alex Singer, MD, BAO, BCh, CCFP<sup>12</sup> [alexandersinger@gmail.com](mailto:alexandersinger@gmail.com)  
Erin Keely, MD FRCPC<sup>13,14</sup> [ekeely@toh.ca](mailto:ekeely@toh.ca)

<sup>1</sup>C.T. Lamont Primary Health Care Research Centre, Department of Family Medicine, University of Ottawa, Ottawa, Ontario, Canada

<sup>2</sup> Bruyère Research Institute, Ottawa, Ontario, Canada

<sup>3</sup>Department of Medicine, University of Alberta, Calgary, Alberta, Canada

<sup>4</sup>Newfoundland and Labrador Medical Association, St. John's, Newfoundland and Labrador, Canada

<sup>5</sup>Canadian Foundation for Healthcare Improvement, Ottawa, Ontario, Canada

<sup>6</sup>Department of Family Medicine, McGill University, Montreal, Quebec, Canada

<sup>7</sup>Department of Family Medicine, Memorial University, St. John's, Newfoundland and Labrador, Canada

<sup>8</sup>Alberta Referral Pathways, Calgary, Alberta, Canada

<sup>9</sup>Nine Circles Community Health Centre, Winnipeg, Manitoba, Canada

<sup>10</sup>Université du Québec en Outaouais, Gatineau, Quebec, Canada

<sup>11</sup>Department of Surgery, University of Manitoba, Winnipeg, Manitoba, Canada

<sup>12</sup>Department of Family Medicine, University of Manitoba, Winnipeg, Manitoba, Canada

<sup>13</sup>Department of Medicine, University of Ottawa, Ottawa, Ontario, Canada

<sup>14</sup>Division of Endocrinology/Metabolism, The Ottawa Hospital, Ottawa, Ontario, Canada

Corresponding author at:

Clare Liddy

Bruyère Research Institute

43 Bruyère St, Annex E, Room 106

Ottawa, ON K1N 5C8

Tel.: 613- 562-6262 ext. 2928

Fax: 613-562-6099

e-mail: [cliddy@bruyere.org](mailto:cliddy@bruyere.org)

## Abstract

**Objective:** To examine the process of implementing an electronic consultation (eConsult) service and evaluate its impact along key metrics outlined by the RE-AIM framework.

**Design:** Cross-sectional study.

**Setting:** Clinics using eConsult in four provinces across Canada: Alberta, Manitoba, Quebec, and Newfoundland and Labrador.

**Participants:** All eConsult cases submitted in four participating provinces were included.

**Intervention:** The eConsult service is a secure online application that allows primary care providers and specialists to communicate regarding a patient's care. We measured impact using system utilization data and mandatory close-out surveys completed at the end of each eConsult.

**Main outcome measures:** Implementation progress and impact were examined using the five categories outlined by the RE-AIM framework: reach, effectiveness, adoption, implementation, and maintenance.

**Results:** Four provinces provided data from different periods, ranging from four years (Alberta) to ten months (Manitoba). Total cases completed ranged from 96 (Manitoba) to 6,885 (Alberta). Newfoundland had the largest menu of available specialties (n=35), while Alberta and Quebec had the smallest (n=22). The most frequently requested groups varied across provinces, with only endocrinology appearing in the top five for all provinces. The average specialist response time ranged from 3 days (Manitoba) to 16.7 days (Alberta). Between 54% (Newfoundland) and 66% (Manitoba) of cases resulted in new or additional information. PCPs avoided completing referrals they had originally considered in 36% (Newfoundland) to 53% of cases (Manitoba), while only between 27% (Quebec) and 29% (Newfoundland) of cases resulted in a referral. In

1  
2  
3 every province, services demonstrated higher rates of usage in their last quarter of data than their  
4  
5 first.

6  
7  
8 **Conclusions:** eConsult was successfully implemented in four new provinces across Canada.

9  
10 Implementation strategies and scope varied, but services demonstrated substantial consistency on  
11  
12 several key metrics, most notably on whether new information was learned and impact on  
13  
14 decision to refer.

15  
16  
17 **Keywords:** Primary care; eConsult; referral; access to care; wait times.  
18  
19

## 20 21 **Article Summary**

### 22 *Strengths and limitations of this study*

- 23  
24 • Study data spans four provinces and multiple regions, allowing for a robust examination  
25  
26 of eConsult's generalizability and scalability.
- 27  
28 • The data included was observational and clinician based, which does not allow for a  
29  
30 direct patient perspective.
- 31  
32 • Differences in service structure and data collection meant some metrics could not be  
33  
34  
35  
36  
37  
38 captured across all participating services.  
39  
40  
41  
42  
43  
44  
45  
46  
47  
48  
49  
50  
51  
52  
53  
54  
55  
56  
57  
58  
59  
60

## Introduction

Excessive wait times for specialist care are a serious issue across Canada.(1;2) In the 2016 Commonwealth Fund survey, Canada placed last on the measure of specialist access among eleven countries surveyed, with 56% of Canadians reporting wait times of more than four weeks for a specialist appointment ,versus an average of 36% across all participating countries.(1) Studies assessing specialist wait times across Canada have reported median wait times ranging from five to eleven weeks,(3-6) with median wait for some high-demand specialties (e.g. infectious diseases) reaching up to 24 weeks.(6) Poor access to specialist advice has serious consequences, reducing patients' ability to carry out day-to-day activities, increasing anxiety, and potentially causing an overall deterioration in health.(2) On a health service level, long wait times result in delayed diagnoses, duplicated testing, and dissatisfaction among health care providers—factors that increase costs while reducing quality of care.(7)

In an effort to address this issue, the Champlain BASE™ (Building Access to Specialists through eConsultation) eConsult service was launched in 2010. The BASE™ model of care is a method of care delivery designed to improve access to specialist advice by allowing primary care providers (PCP) to send questions concerning patient care to specialists. It is not a specific technology, and can be adopted on any digital platform capable of facilitating secure communication between PCPs and specialists. In the BASE™ model of care, PCPs seeking specialist advice on a patient's care log onto their platform and select a specialty group (as opposed to an individual specialist). A case assigner allocates the eConsult to an appropriate specialist based on availability. The specialist responds to the PCP's question within one week by providing advice on how to manage the patient, recommending the patient receive a face-to-face referral (not necessarily with them), or requesting additional information. PCPs can ask



1  
2  
3 additional questions. Specialties are added to the service based on PCP requests, and the service  
4  
5 undergoes continual evaluation to ensure quality and seek user feedback.  
6

7  
8 Launched as a small proof-of-concept and soon expanded to a full pilot in the Champlain  
9  
10 health region of Eastern Ontario, Canada, the eConsult service has completed over 50,000  
11  
12 eConsults, enrolled more than 1,400 PCPs, and provides access to 114 specialty groups.  
13  
14 Specialists respond to cases in a median of 1.9 days, and over two-thirds of cases are resolved  
15  
16 without the patient requiring a face-to-face specialist visit.(8) Given its success on a regional  
17  
18 level, the eConsult team engaged in efforts to expand the service to new jurisdictions. However,  
19  
20 Canada faces a number of barriers to successful scale-up, resulting in many projects being unable  
21  
22 to expand beyond their pilot phase.(9;10) In order to avoid these pitfalls, we successfully sought  
23  
24 grants from the Canadian Institutes of Health Research. Through this process, the eConsult team  
25  
26 formed key partnerships with provincial and national organizations in order to support its  
27  
28 expansion to new jurisdictions within Ontario(11) and across provinces. As part of this initiative,  
29  
30 multiple eConsult teams based in their own jurisdictions worked closely with the Canadian  
31  
32 Foundation for Healthcare Improvement (CHFI), which supported eConsult's spread and scale  
33  
34 through a two-phase Connected Medicine Collaborative (Figure 1).  
35  
36  
37  
38  
39

40 Phase 1 of the Collaborative recruited 10 teams from across Canada and internationally  
41  
42 to participate in a 9-month Access to Specialist eConsult Collaborative, in which teams aimed to  
43  
44 develop business cases and strategies to implement one of two remote consult services in their  
45  
46 jurisdictions: the Champlain BASE™ eConsult service, and the telephone-based Rapid Access to  
47  
48 Consultative Expertise (RACE) service.(12) CFHI supported teams by facilitating sharing of  
49  
50 information and hosting multiple online and face-to-face touchpoints with the innovators and  
51  
52 new implementation sites. Phase 2 built on the previous initiative to launch a 15-month Quality  
53  
54  
55  
56  
57  
58  
59  
60

1  
2  
3 Improvement Collaborative, with 11 teams in 7 provinces participating.<sup>(13)</sup> As a result of these  
4 initiatives, eConsult services have been launched in Alberta, Manitoba, Quebec, Newfoundland  
5 and Labrador, and New Brunswick. Throughout this process, the teams have encountered various  
6 challenges and learned a number of important lessons, which will be relevant to those seeking to  
7 spread, scale and sustain health care innovations.  
8  
9  
10  
11  
12  
13

14 In this study, we examine the process of implementing eConsult in four Canadian  
15 provinces, and evaluate their impact along key metrics outlined by the RE-AIM framework.  
16  
17  
18

## 19 **Methods**

### 20 *Design*

21 This study involves a cross-sectional analysis of data from eConsult services implemented in  
22 four provinces across Canada.  
23  
24  
25  
26  
27

### 28 *Setting*

29 In order to evaluate the impact of eConsult's replication, this study draws data from eConsult  
30 services in Alberta (AB), Manitoba (MB), Quebec (QC), and Newfoundland and Labrador (NL).  
31 Services in three of these provinces (MB, QC, NL) operate using a platform identical to the  
32 BASE™ model of care, which was first developed in Ottawa, Ontario in 2009. The remaining  
33 province (AB) incorporated an eReferral service with eConsult capabilities similar principles to  
34 the BASE model into its provincial electronic health record, called Alberta Netcare, in 2014.  
35 While an eConsult service has been implemented in New Brunswick using the BASE™ model,  
36 the service had only minimal data at the time of this study and was thus excluded.  
37  
38  
39  
40  
41  
42  
43  
44  
45  
46  
47  
48

49 The Canadian healthcare system is publically funded, and provides universal access to a  
50 host of clinical services, including primary care, specialty care, and emergency medicine. Other  
51 elements of healthcare, such as pharmaceuticals and allied health services, are not universally  
52  
53  
54  
55  
56  
57  
58  
59  
60

1  
2  
3 funded. While the federal government provides funding, each province and territory is  
4  
5 responsible for overseeing the administration of healthcare in its jurisdiction, with the exception  
6  
7 of some specialty populations where care is managed federally (e.g. First Nations communities,  
8  
9 members of the military, and inmates of federal penitentiaries). As such, the exact healthcare  
10  
11 context varies slightly between the provinces participating in this study.  
12  
13

### 14 ***RE-AIM framework***

15  
16 As part of our CIHR-funded activities to explore the factors critical to eConsult's successful  
17  
18 adoption, we utilized the RE-AIM framework to assess eConsult's impact based on five criteria:  
19  
20 1) Reach into the target population; 2) Effectiveness or efficacy; 3) Adoption by target settings,  
21  
22 institutions and staff; 4) Implementation, including its consistency and costs of delivery; and 5)  
23  
24 Maintenance of intervention effects in individuals and settings over time.<sup>(14)</sup> A description of  
25  
26 each criterion and its associated metrics is included in Appendix A.  
27  
28  
29

### 30 ***Participants***

31  
32 This study includes aggregated information from eConsult cases completed in the four  
33  
34 participating provincial services.  
35  
36

### 37 ***Analysis***

38  
39 Each participating province contributed data collected by the service. This includes utilization  
40  
41 data collected automatically (e.g. specialty group submitted to, response time) and responses to  
42  
43 surveys completed at the conclusion of each case. The AB service does not include a closeout  
44  
45 survey, so was exempted from metrics that relied on survey data. Data reporting periods varied  
46  
47 between provinces out of necessity, as provinces implemented eConsult at different points in  
48  
49 time. Where possible, at least one year of data was included. A complete list of data metrics  
50  
51 available from each service is presented in Table 1.  
52  
53  
54  
55  
56  
57  
58  
59  
60

**Table 1.** Data available for analysis from each of the four participating services.

| <b>Data Metric</b>                                               | <b>AB</b> | <b>MB</b> | <b>QC</b> | <b>NL</b> |
|------------------------------------------------------------------|-----------|-----------|-----------|-----------|
| <b>Reach</b>                                                     |           |           |           |           |
| Total number of cases completed                                  | X         | X         | X         | X         |
| Number of specialties available                                  | X         | X         | X         | X         |
| Top five most frequently requested specialties                   | X         | X         | X         | X         |
| <b>Effectiveness</b>                                             |           |           |           |           |
| Average specialist response time                                 | X         | X         | X         | X         |
| Proportion of advice on new/additional action                    |           | X         | X         | X         |
| Whether a referral was originally considered/ultimately provided |           | X         | X         | X         |
| PCP satisfaction                                                 |           | X         | X         | X         |
| <b>Adoption</b>                                                  |           |           |           |           |
| Number of PCPs who joined the service                            | X         | X         | X         | X         |
| Number of clinics with participating PCPs                        |           | X         | X         |           |
| Number of cities/towns with participating PCPs                   | X         | X         | X         | X         |
| Number of specialists who joined the service                     |           | X         | X         | X         |
| PCP enrollment by month                                          |           | X         | X         |           |
| Proportion of active PCPs (submitted $\geq 1$ case)              |           | X         | X         | X         |
| <b>Implementation</b>                                            |           |           |           |           |
| Hosts and Key Partners                                           | X         | X         | X         | X         |
| Platform                                                         | X         | X         | X         | X         |
| Payment model                                                    | X         | X         | X         | X         |
| <b>Maintenance</b>                                               |           |           |           |           |
| Number of cases completed over time (e.g. monthly case volume)   | X         | X         | X         | X         |
| Number of PCPs who joined the service during the one year period |           | X         | X         |           |

AB = Alberta; MB = Manitoba; QC = Quebec, NL = Newfoundland and Labrador

### ***Ethics***

The Ottawa Health Science Network and Bruyère Research Ethics Boards provided ethics approval for this project.

### ***Patient and Public Involvement***

Patient representatives are an important part of eConsult's decision-making team, and inclusion of patient voices has been a cornerstone of the service's process of evaluation and dissemination of knowledge.<sup>(15)</sup> However, this study did not draw on direct patient data, but instead relied on

aggregate utilization data and survey responses from PCPs. Patient involvement in this particular study was therefore limited.

## Results

### *Reach*

The reporting period for the study varied between provinces. MB had the shortest reporting period, with data from December 2017 to September 2018, while AB had the longest, with data from August 2014 to July 2018. The total number of cases completed ranged from 96 cases (MB) to 6,885 cases (AB). When expressed as population rates in the first year of implementation, PCPs completed 1.14 eConsults per 1000 people in NL, 0.04 eConsults per 1000 people in Quebec, 0.07 eConsults per 1000 people in Manitoba, and 0.0035 eConsults per 1000 people in Alberta. Data on the number of cases completed, population rates, and providers enrolled is listed in Table 2.

**Table 2.** The data reporting period, number of cases completed , and specialties available for eConsult services across provinces

|                                        | Alberta             | Manitoba            | Quebec              | Newfoundland and Labrador |
|----------------------------------------|---------------------|---------------------|---------------------|---------------------------|
| <b>Data reporting period</b>           | Jan 2014 – Mar 2018 | Dec 2017 – Sep 2018 | Jul 2017 – Jun 2018 | Sep 2016 – Jul 2018       |
| <b># cases completed</b>               | 6,885               | 96                  | 450                 | 1,656                     |
| <b># cases completed in first year</b> | 15                  | 96                  | 334                 | 603                       |
| <b>Population of province(16)</b>      | 4,286,134           | 1,338,109           | 8,394,034           | 528,817                   |
| <b># eConsults/ 1000 people</b>        | 0.0035              | 0.07                | 0.04                | 1.14                      |
| <b># PCPs enrolled</b>                 | 1,446               | 93                  | 139                 | 191                       |
| <b># specialists enrolled</b>          |                     | 31                  | 55                  | 56                        |
| <b># specialties</b>                   | 22                  | 25                  | 22                  | 35                        |

| available                                                 |                                                                                                                                                    |                                                                                                                                                                                                              |                                                                                                                                                         |                                                                                                                                                     |
|-----------------------------------------------------------|----------------------------------------------------------------------------------------------------------------------------------------------------|--------------------------------------------------------------------------------------------------------------------------------------------------------------------------------------------------------------|---------------------------------------------------------------------------------------------------------------------------------------------------------|-----------------------------------------------------------------------------------------------------------------------------------------------------|
| <b>Average response time (days)</b>                       | 16.7                                                                                                                                               | 3                                                                                                                                                                                                            | 4                                                                                                                                                       | 3.5                                                                                                                                                 |
| <b>Top 5 most frequent specialties referred to (N[%])</b> | 1. urology (n=6,400, 93%)<br>2. gastroenterology (n=122, 2%)<br>3. nephrology (n=117, 2%)<br>4. endocrinology (n=73, 1%)<br>5. oncology (n=46, 1%) | 1. dermatology (n=28, 29%)<br>2. hepatology (n=14, 15%)<br>3. cardiology (n=13, 14%)<br>4. hematology (n=8, 8%)<br>5a. allergy medicine (n=5, 5%)<br>5b. endocrinology (n=5, 5%)<br>5c. nephrology (n=5, 5%) | 1. internal medicine (n=101, 22%)<br>2. dermatology (n=82, 19%)<br>3. obstetrics (n=64, 15%)<br>4. endocrinology (n=39, 9%)<br>5. psychiatry (n=32, 7%) | 1. hematology (n=184, 11%)<br>2. neurology (n=167, 10%)<br>3. cardiology (n=161, 10%)<br>4. endocrinology (n=148, 9%)<br>5. dermatology (n=142, 9%) |

PCP = primary care provider

Services offered a range of specialties, with NL offering the greatest variety (n=35), and AB and QC the least (n=22). The most frequently requested groups varied across provinces. Only endocrinology appeared in the top five specialties across all provinces (Table 1). The top ten most frequently referred to specialties across services are displayed in Figure 2.

### ***Effectiveness***

The average specialist response time ranged from 3 days (MB) to 16.7 days (AB). Between 54% (NL) and 66% (MB) of cases resulted in the PCP getting new or additional information to use in their patient's treatment (Figure 3). PCPs avoided completing referrals they had originally considered in 36% (NL) to 53% of cases (MB), while only between 24% (MB) and 29% (NL) of cases resulted in patients still requiring a referral (Figure 4). Furthermore, in a small number of cases (QC, NL: 3%; MB: 1%), PCPs had not originally considered a referral but implemented one based on specialist advice.

1  
2  
3 Across all services where PCP survey data was collected, PCPs expressed high levels of  
4 satisfaction with the eConsult service. PCPs ranked specialists' responses as high or very high  
5 value for their patients in 96% (QC), 95% (NL), and 96% (MB) of cases (Figure 5).  
6  
7

### 8 9 ***Adoption***

10  
11 Services from each province varied in scope. As the most recently implemented service  
12 (launched in December 2017), the MB service was also the smallest, with 93 PCPs enrolled  
13 across 18 clinics in 9 municipalities, and 31 practicing specialists. The QC service enrolled 139  
14 PCPs, who practiced in 11 clinics across three different regions (Outaouais, Abitibi, and  
15 Maurice), as well as 55 specialists practicing in 3 specialty clinics. The NL service demonstrated  
16 the broadest scope of adoption among services using the BASE™ model, with 252 enrolled  
17 PCPs practicing in 33 municipalities across the province, and 56 participating specialists. The  
18 AB service was the largest overall, with 1,446 participating PCPs across 46 municipalities. PCP  
19 enrollment over time is presented in Figure 6.  
20  
21  
22  
23  
24  
25  
26  
27  
28  
29  
30  
31  
32

33 Of the 93 PCPs enrolled in the MB service, 32% (n=30) were active users, meaning they  
34 had submitted at least one case. QC demonstrated a similar rate of active users, with 33% (n=44)  
35 of the 135 enrolled PCPs submitting at least one case. NL showed a higher ratio of active users,  
36 with 56% (n=140) of enrolled PCPs deemed active.  
37  
38  
39  
40  
41

### 42 ***Implementation***

43  
44 The implementation strategy for each province varied based on the needs of its population and  
45 the infrastructure already in place. Each service partnered with regional and provincial groups  
46 capable of hosting the service and expanding it to new jurisdictions (Table 3). In MB and NL,  
47 the BASE™ platform was replicated directly and provided as part of CIHR funded grants,  
48 following the template laid in the Champlain region and using the same software (Microsoft  
49  
50  
51  
52  
53  
54  
55  
56  
57  
58  
59  
60

SharePoint). By contrast, QC adopted the BASE™ model of managed care, but built the service on the Enterprise Telehealth Platform already in operation on the Quebec Healthcare Network in order to leverage existing infrastructure. AB incorporated eConsult into Alberta Netcare, the electronic health record responsible for storing patients' health information province-wide.

Methods for payment vary between provinces. In AB, providers are compensated by submitting fee codes in the same manner as other services, with separate codes and rates established for referring (\$32.43) and responding (\$76.27) providers. In the other provinces, fee codes are either not available (QC, NL) or too low to adequately support the service (MB). Payment is thus provided through the service, with specialists earning \$200 per hour prorated to the length of time spent answering the case.

**Table 3.** Details on the platform, host organization, and payment models for participating eConsult services.

|                               | <b>Alberta</b>                                 | <b>Manitoba</b>                                                                              | <b>Quebec</b>                                                                                                                   | <b>Newfoundland and Labrador</b>                                                                                                                 |
|-------------------------------|------------------------------------------------|----------------------------------------------------------------------------------------------|---------------------------------------------------------------------------------------------------------------------------------|--------------------------------------------------------------------------------------------------------------------------------------------------|
| <b>Hosts and Key Partners</b> | AB Health Services, AB Health                  | Shared Health Services Manitoba, eHealth Manitoba, Research Manitoba, University of Manitoba | Télésanté Ruis McGill, Centre Intégré de Santé et de Services Sociaux de l'Outaouais, Collège Québécois des Médecins de Famille | NL Medical Association, Department of Health and Community Services, Memorial University eHealth Research Unit, NL Centre for Health Information |
| <b>Platform</b>               | Orion Health, built within Alberta Netcare     | SharePoint                                                                                   | Enterprise Telehealth Platform, built within Quebec Healthcare Network                                                          | SharePoint                                                                                                                                       |
| <b>Payment model</b>          | Fee codes (\$32.43 referral, \$76.27 response) | Through service (\$200/hour prorated)                                                        | Through service (\$200/hour prorated)                                                                                           | Through service (\$200/hour prorated)                                                                                                            |

AB = Alberta; MB = Manitoba; NL = Newfoundland and Labrador



1  
2  
3 The provincial services have engaged in various activities supporting eConsult's  
4 implementation in their jurisdictions. AB Netcare eReferral engaged in a number of promotional  
5 activities aimed at physicians and clinical support staff, including presentation at local and  
6 provincial conferences, publication through regional authorities (e.g. AB Medical Association,  
7 AB College of Physicians and Surgeons) and service-affiliated websites (e.g. AHS, AB Netcare  
8 eReferral and Calgary Zone Specialist LINK), in-person training, and webinars. The AB team  
9 worked collaboratively with the primary care networks and various specialty groups in the  
10 province to engage physicians to facilitate adoption of eReferral. In MB, activities included  
11 presentations (e.g. Manitoba College of Family Physicians Annual Scientific Assembly, the  
12 University of Manitoba Academic Days), publications (e.g. Manitoba College of Family  
13 Physician's MCFP E\_News Update, Nine Circles Community Health Centers Annual Report),  
14 and outreach to local PCPs and specialists. In QC, activities included outreach to provincial and  
15 national organizations (e.g. Quebec College of Family Physicians, Canada Health Infoway),  
16 presentation at conferences (e.g. Centre intégré de santé et des services sociaux de l'Outaouais  
17 (CISSSCO) Research Day(17)), and publications highlighting eConsult in professional and  
18 popular media (e.g. Réseau-1 Québec,(18) CISSSCO newsletter,(19) Le Droit(20)). In NL,  
19 promotional activities included presentations (e.g., NL Medical Association Annual General  
20 Meeting, Nurse Practitioner's Professional Practice Group NL, Primary Healthcare Partnership  
21 Forum, NL College of Family physicians Annual Scientific Assembly), publications  
22 disseminated through the NL Medical Association (e.g., President Letters, eUpdates, page on the  
23 NL Medical Association website dedicated to eConsult) and outreach to local PCPs and  
24 specialists.

### 25 ***Maintenance***

1  
2  
3 All participating services demonstrated growth of usage during the study period, though case  
4 volumes varied based on the number of users and length of time the service had been established.  
5  
6  
7 Monthly case volumes for MB, QC, and NL are shown in Figure 7; given the substantial  
8 difference in scale between AB and other services, monthly case volumes for AB are charted  
9 separately in Figure 8. In every case, services demonstrated higher rates of usage in their last  
10 quarter of data than their first. In NL, the service completed an average of 16.3 cases/month in its  
11 first quarter of available data versus 121.7 cases/month in its last quarter. In QC, there were 4.7  
12 cases/month in the first quarter versus 83 cases/month in the last quarter. MB's data spanned less  
13 than four full quarters, with 2 cases/month in the first three-month period and 13.6 cases/month  
14 in the last. AB completed 2.3 cases/month in its first quarter and 527 cases/month in its last  
15 quarter.  
16  
17  
18  
19  
20  
21  
22  
23  
24  
25  
26  
27

28 The participating services are at different stages of implementation. AB is a fully  
29 sustained service, integrated into the provincial EMR platform and funded directly by the  
30 province. NL has also entered the sustainability phase, with provincial expansion underway. MB  
31 and QC remain regional services at present, though in both cases discussions regarding  
32 provincial expansion and sustainment are ongoing.  
33  
34  
35  
36  
37  
38  
39

## 40 Discussion

41  
42 eConsult is a promising technology tool designed to reduce wait times to access specialist  
43 advice. Our findings demonstrated eConsult's spread and scale in four provinces across Canada,  
44 with a growing number of Canadians benefiting from rapid access to specialist advice through  
45 eConsult. The implementation process varied between regions based on existing services, local  
46 needs, and clinical champions, allowing us to take a tailored approach that fit each community.  
47  
48  
49  
50  
51  
52  
53  
54 However, once implementation began, the services demonstrated a common pattern of growth,  
55  
56  
57  
58  
59  
60

1  
2  
3 reported similar response times and case outcomes, and delivered similarly high levels of  
4  
5 provider satisfaction. In all cases, the median response time was far shorter than the five to 11  
6  
7 week-long median waits for specialist appointments reported in the literature. Using the RE-AIM  
8  
9 framework allowed us to paint a broad comparative picture of the service in each region.  
10  
11

12 Barriers to spread and scale have limited the adoption of many promising healthcare  
13  
14 innovations. Canada has a reputation of being a “land of perpetual pilot projects,” where  
15  
16 programs are regularly initiated but often fail to expand or sustain themselves beyond their initial  
17  
18 implementation period.(9;10) In their 2015 report, Naylor et al. highlight several barriers to an  
19  
20 innovation’s spread, including a lack of funding tailored to scaling up pilots, too little focus on  
21  
22 patient-centred care, aversion to deploying digital technology, and a fragmented healthcare  
23  
24 system that inadvertently promotes regional siloing.(10)  
25  
26  
27

28 Our team has worked to overcome these barriers through strong and fruitful partnerships  
29  
30 with provincial and national organizations. These groups can provide vital sources for funding,  
31  
32 and support interjurisdictional coordination and knowledge sharing to ensure successful ideas do  
33  
34 not get lost, but have the opportunity to be tested and replicated in new environments. The CFHI  
35  
36 Connected Medicine Collaborative, cited in the introduction of this paper, is a good example.  
37  
38 Launched in 2015, the program has led to the successful implementation of 11 programs across 7  
39  
40 provinces.(12) Much of its success stemmed from taking programs that had demonstrated  
41  
42 effectiveness along key metrics, and allowing motivated groups in other provinces to replicate  
43  
44 them while drawing on the expertise of previous implementers. Beyond the Collaborative, our  
45  
46 team has endeavored to promote knowledge-sharing through our Think Tank and National  
47  
48 Forum, annual events that draw clinicians, patients, and decision-makers from across Canada to  
49  
50 discuss issues pertinent to eConsult’s expansion.(15) The third meeting was held in November  
51  
52  
53  
54  
55  
56  
57  
58  
59  
60

1  
2  
3 2018, with a focus on developing best practices to support the spread of eConsult and eReferral  
4 nation-wide. Patient partners have consistently been well-represented at these events, reflecting  
5  
6 our team's commitment to maintaining a patient-centered approach to care.  
7  
8  
9

10 Some factors, such as the number of cases completed, PCPs enrolled, and specialty  
11 services available, varied substantially between provinces, and are reflected in the provincial  
12 population rates of completed eConsults per 1,000 people during the first year of  
13  
14 implementation. These variations are to be expected, given differences in implementation  
15 strategy, local needs and provider availability, scope, and the fact that some services had been  
16 implemented for a longer period than others—for instance, the AB service included cases from  
17 August 2014 to July 2018, while the MB service was first launched in December 2017 and thus  
18 could only report cases over a 10-month period. The population rates observed in the present  
19 study ranged from 0.0035 to 1.14 eConsults per 1000 people. In the cases of MB, QC, and NL,  
20 this level of usage exceeds that exhibited in the service's first year in the Champlain region (0.16  
21 eConsults per 1,000 people) and the Mississauga Halton region (0.36 eConsults per 1,000  
22 people).<sup>(11)</sup> This increased uptake likely stems from the fact that these services were able to  
23 build on an established model of care, and leverage the network of support originally generated  
24 in Ontario. AB is the outlier in this regard, as it showed an irregular pattern of usage growth  
25 reflecting its origins as an eReferral platform on which eConsult capabilities were only fully  
26 utilized after several years of implementation. Furthermore, it is worth noting that the AB service  
27 was implemented within a pre-established platform (i.e. Netcare) that already had a substantial  
28 user base in the province. As such, recruitment was less burdensome, as it entailed getting PCPs  
29 to use a new function within a familiar platform, rather than encouraging them to learn an  
30  
31  
32  
33  
34  
35  
36  
37  
38  
39  
40  
41  
42  
43  
44  
45  
46  
47  
48  
49  
50  
51  
52  
53  
54  
55  
56  
57  
58  
59  
60

1  
2  
3 entirely new application, which potentially explains the rapid growth in usage in 2017 when the  
4 service's eConsult capabilities were first emphasized.  
5  
6

7  
8 More consistency between provinces was seen in PCPs' responses to closeout surveys  
9  
10 among the three services where these surveys were used (MB, QC, NL), particularly between  
11  
12 QC and NL. MB demonstrated results that varied from the other two provinces, likely due to QC  
13  
14 and NL having a larger number of completed cases, (450 and 1,656, respectively), allowing for a  
15  
16 more robust sample. This assumption is supported by the latest numbers reported by the  
17  
18 Champlain BASE™ eConsult service. In a recent study assessing 14,105 Champlain BASE  
19  
20 eConsult cases completed over a five-year period, PCPs' survey responses closely aligned with  
21  
22 those from the QC and NL services: PCPs reported new/additional advice in 57% of cases  
23  
24 (versus 58% in QC and 54% in NL), and 32% of cases resulted in a face-to-face referral (versus  
25  
26 27% in QC and 29% in NL).(8) Given time, we anticipate that survey responses for the MB  
27  
28 service will draw closer to this range.  
29  
30  
31  
32

33 The main strength of this study is the breadth of its data, which spans four provinces and  
34  
35 multiple regions. By collating measures of eConsult's impact across multiple jurisdiction, our  
36  
37 findings make a strong case for eConsult's generalizability and scalability. However, our study  
38  
39 also has several limitations. The data included was observational and clinician based, which does  
40  
41 not allow for a direct patient perspective. Differences in service structure and data collection  
42  
43 meant some metrics could not be captured across all participating services.  
44  
45  
46

## 47 **Conclusion**

48  
49 The eConsult service has been successfully implemented in four new provinces across Canada,  
50  
51 three using the BASE™ model (MB, QC, NL) and one incorporating eConsult capabilities into  
52  
53 an existing eReferral platform (AB). Implementation strategies and scope varied, but services  
54  
55  
56  
57  
58  
59  
60

1  
2  
3 demonstrated consistency on several key metrics, most notably case outcomes. Further time and  
4  
5 research is needed to assess the long-term sustainability of these services and their impact on  
6  
7 outcomes affecting patient health.  
8

### 9 10 **Acknowledgements**

11  
12 The authors wish to thank the PCPs and specialists who use the service, and Justin Joschko for  
13  
14 his assistance in editing the manuscript and preparing it for publication.  
15

### 16 17 **Contributorship statement**

18  
19 CL and EK conceived of and designed the study, and contributed to the data analysis and  
20  
21 drafting of the publication. AB, JC, MDP, GF, JG, LI, LO, RM, VN, and AS contributed data to  
22  
23 the study and were involved with its conception, conduct, analysis, and reporting. ND  
24  
25 contributed to its data analysis. All authors helped write and edit the manuscript, and approved  
26  
27 the final draft.  
28  
29

### 30 31 **Funding**

32  
33 Funding for this project was provided through the Canadian Institutes of Health Research. The  
34  
35 authors affirm their independence from these funders. The funders played no part in the study  
36  
37 design, collection, analysis, or interpretation of the data, in the writing of the report, or in the  
38  
39 decision to submit the article for publication. All authors had full access to all the data in the  
40  
41 study and can take responsibility for the integrity of the data and the accuracy of the data  
42  
43 analysis.  
44  
45

### 46 47 **Competing interest declaration**

48  
49 All authors have completed the ICMJE uniform disclosure form at  
50  
51 [www.icmje.org/coi\\_disclosure.pdf](http://www.icmje.org/coi_disclosure.pdf) and declare: no support from any organisation for the  
52  
53 submitted work; no financial relationships with any organisations that might have an interest in  
54  
55  
56  
57  
58  
59

1  
2  
3 the submitted work in the previous three years; no other relationships or activities that could  
4 appear to have influenced the submitted work.  
5  
6

### 7 **Ethics approval**

8  
9  
10 This study was approved by the Ottawa Health Science Network Research Ethics Board  
11  
12 (Protocol # 2009848-01H).  
13

### 14 **Data availability statement**

15  
16 Data from the study is available from the corresponding author upon reasonable request.  
17  
18

### 19 **Transparency declaration**

20  
21 The lead author, CL, affirms that the manuscript is an honest, accurate, and transparent account  
22 of the study being reported; that no important aspects of the study have been omitted; and that  
23 any discrepancies from the study as planned (and, if relevant, registered) have been explained.  
24  
25 All authors had full access to the data and can take responsibility for the integrity of the data and  
26 the accuracy of the analysis.  
27  
28  
29  
30  
31

### 32 **Copyright/licence for publication**

33  
34 The Corresponding Author has the right to grant on behalf of all authors and does grant on behalf  
35 of all authors, a worldwide licence to the Publishers and its licensees in perpetuity, in all forms,  
36 formats and media (whether known now or created in the future), to i) publish, reproduce,  
37 distribute, display and store the Contribution, ii) translate the Contribution into other languages,  
38 create adaptations, reprints, include within collections and create summaries, extracts and/or,  
39 abstracts of the Contribution, iii) create any other derivative work(s) based on the Contribution,  
40 iv) to exploit all subsidiary rights in the Contribution, v) the inclusion of electronic links from  
41 the Contribution to third party material where-ever it may be located; and, vi) licence any third  
42  
43  
44  
45  
46  
47  
48  
49  
50  
51  
52  
53  
54  
55  
56  
57  
58  
59  
60

1  
2  
3 party to do any or all of the above.  
4  
5  
6  
7  
8  
9  
10  
11  
12  
13  
14  
15  
16  
17  
18  
19  
20  
21  
22  
23  
24  
25  
26  
27  
28  
29  
30  
31  
32  
33  
34  
35  
36  
37  
38  
39  
40  
41  
42  
43  
44  
45  
46  
47  
48  
49  
50  
51  
52  
53  
54  
55  
56  
57  
58  
59  
60

For peer review only



## References

- 1) Canadian Institute for Health Information. *How Canada Compares: Results From The Commonwealth Fund's 2016 International Health Policy Survey of Adults in 11 Countries*. Ottawa: Canadian Institute for Health Information; 2012.  
<https://www.cihi.ca/sites/default/files/document/text-alternative-version-2016-cmwf-en-web.pdf>, 14 July, 2017
- 2) Canadian Intitute for Health Information. *Health Care in Canada, 2012: A Focus on Wait Times*. Ottawa: Canadian Institute for Health Information; 2012.  
[https://secure.cihi.ca/free\\_products/HCIC2012-FullReport-ENweb.pdf](https://secure.cihi.ca/free_products/HCIC2012-FullReport-ENweb.pdf), 14 July, 2017
- 3) Jaakkimainen L, Glazier R, Barnsley J, Salkeld E, Lu H, Tu K. Waiting to see the specialist: patient and provider characteristics of wait times from primary to specialty care. *BMC Family Practice* 2014;15(1):16.
- 4) Thind A, Stewart M, Manuel D, Freeman T, Terry A, Chevendra V, et al. What are wait times to see a specialist? An analysis of 26,942 referrals in southwestern Ontario. *Healthcare Policy* 2012;8(1):80.
- 5) Thanh NX, Wanke M, McGeachy L. Wait time from primary to specialty care: a trend analysis from Edmonton, Canada. *Healthcare Policy* 2013;8(4):35-44.
- 6) Neimanis I, Gaebel K, Dickson R, Levy R, Goebel C, Zizzo A, et al. Referral processes and wait times in primary care. *Canadian Family Physician* 2017;63(8):619-24.
- 7) Barua B, Esmail N. *Waiting Your Turn: Wait Times for Health Care in Canada*. Vancouver: Fraser Institute; 2013. <http://www.fraserinstitute.org/uploadedFiles/fraser-ca/Content/research-news/research/publications/waiting-your-turn-2013.pdf>, 14 July, 2017

- 1  
2  
3 8) Liddy C, Moroz I, Afkham A, Keely E. Sustainability of a primary care driven eConsult  
4 service. *Annals Of Family Medicine* 2018;16(2):120-8.  
5  
6
- 7  
8 9) Bégin HM, Eggertson L, Macdonald N. A country of perpetual pilot projects. *Canadian*  
9  
10 *Medical Association Journal* 2009;180(12):1185.  
11
- 12 10) Naylor D, Girard F, Mintz JM, Fraser N, Jenkins T, Power C, et al. Unleashing  
13  
14 *Innovation: Excellent Healthcare for Canada: Report of the Advisory Panel on Healthcare*  
15 *Innovation*. Ottawa, ON: Government of Canada; 2015.  
16  
17
- 18 11) Liddy C, Moroz I, Afkham A, Keely E. Evaluating the Implementation of The Champlain  
19  
20 *BASE eConsult Service in a New Region of Ontario, Canada: A Cross-Sectional Study.*  
21  
22 *Healthcare Policy* 2017;13(2):79-95.  
23  
24
- 25 12) Canadian Foundation for Healthcare Improvement. *Connected Medicine: Enhancing*  
26  
27 *Access to Specialist Consult e-Collaborative (Access to Specialist Consult).*  
28  
29 <http://www.cfhi-fcass.ca/WhatWeDo/access> 12 October ,2018  
30  
31
- 32 13) Canadian Foundation for Healthcare Improvement. *Connected Medicine.*  
33  
34 <https://www.cfhi-fcass.ca/WhatWeDo/connected-medicine> 12 October, 2018  
35  
36
- 37 14) Glasgow RE, Vogt TM, Boles SM. Evaluating the public health impact of health  
38  
39 *promotion interventions: the RE-AIM framework. Am J Public Health* 1999  
40  
41 *Sep;89(9):1322-7.*  
42  
43
- 44 15) Liddy C, Moroz I, Joschko J, Horsley T, Kuziemyky C, Kovacs Burns K, et al. Using an  
45  
46 *integrated knowledge translation (IKT) approach to enable policy change for electronic*  
47  
48 *consultations in Canada. Healthcare Policy* 2018;14(1):19-29  
49  
50
- 51 16) Statistics Canada. *Canada at a Glance 2018: Population.*  
52  
53 <https://www150.statcan.gc.ca/n1/pub/12-581-x/2018000/pop-eng.htm> 14 December, 2018  
54  
55  
56  
57  
58  
59  
60

- 1  
2  
3  
4  
5  
6  
7  
8  
9  
10  
11  
12  
13  
14  
15  
16  
17  
18  
19  
20  
21  
22  
23  
24  
25  
26  
27  
28  
29  
30  
31  
32  
33  
34  
35  
36  
37  
38  
39  
40  
41  
42  
43  
44  
45  
46  
47  
48  
49  
50  
51  
52  
53  
54  
55  
56  
57  
58  
59  
60
- 17) Nabelsi V, Lévesque-Chouinard A, Roy M-C. Projet BASE™ eConsult Québec. Centre Intégré de santé et de services sociaux de l'Outaouais; 2018. <https://ciyss-outaouais.gouv.qc.ca/wp-content/uploads/2018/06/R%C3%A9sum%C3%A9s-affiches.pdf> 4 December, 2018.
  - 18) Réseau-1 Québec. Scaling-up eConsult in Primary Health Care: a policy analysis in four Canadian provinces. <http://reseau1quebec.ca/projets-isspli/scaling-up-econsult-in-primary-health-care-a-policy-analysis-in-four-canadian-provinces/> 4 December, 2018.
  - 19) Centre intégré de santé et de services sociaux de l'Outaouais. « eConsult Québec » : à un clic d'un médecin spécialiste! <https://ciyss-outaouais.gouv.qc.ca/wp-content/uploads/2018/04/Bulletin-Au-fil-5-avril-2018-n61-3.pdf> 4 December, 2018.
  - 20) Mercier J. Un spécialiste en quelques clics. <https://www.ledroit.com/actualites/sante/un-specialiste-en-quelques-clics-746477a18b3b98b227809525af6f6e6e> 4 December, 2018.

## Figure Legends

**Figure 1.** Timeline of the Canadian Foundation for Healthcare Improvement's two-phase Connected Medicine Collaborative

**Figure 2.** The top ten most frequently requested specialties across services

AB = Alberta; MB = Manitoba; QC = Quebec, NL = Newfoundland and Labrador

**Figure 3.** Which of the following best describes the outcome of this eConsult for your patient?

QC = Quebec, NL = Newfoundland and Labrador

**Figure 4.** Impact of eConsult on referral based on PCP response to closeout survey

QC = Quebec, NL = Newfoundland and Labrador, MB = Manitoba

**Figure 5.** Primary care provider-reported value of eConsult for their patients on a 5-point Likert scale

QC = Quebec, NL = Newfoundland and Labrador, MB = Manitoba

**Figure 6.** PCP enrollment in eConsult services by month

**Figure 7.** Monthly case volume of eConsult by province for Newfoundland and Labrador, Quebec, and Manitoba

**Figure 8.** Monthly case volume of eConsult in Alberta (Newfoundland and Labrador, Quebec, and Manitoba services included for scale)

1  
2  
3  
4  
5  
6  
7  
8  
9  
10  
11  
12  
13  
14  
15  
16  
17  
18  
19  
20  
21  
22  
23  
24  
25  
26  
27  
28  
29  
30  
31  
32  
33  
34  
35  
36  
37  
38  
39  
40  
41  
42  
43  
44  
45  
46  
47  
48  
49  
50  
51  
52  
53  
54  
55  
56  
57  
58  
59  
60

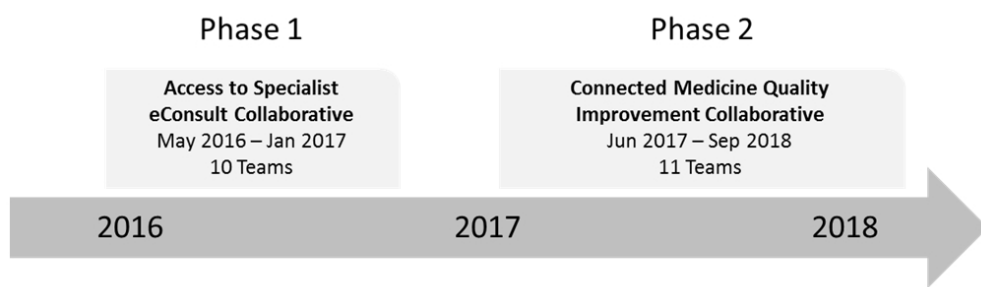

86x27mm (300 x 300 DPI)

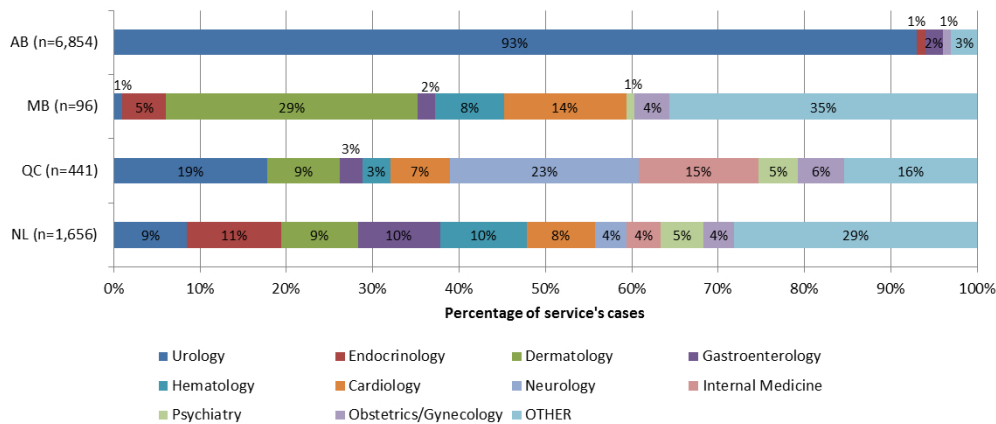

96x42mm (300 x 300 DPI)

1  
2  
3  
4  
5  
6  
7  
8  
9  
10  
11  
12  
13  
14  
15  
16  
17  
18  
19  
20  
21  
22  
23  
24  
25  
26  
27  
28  
29  
30  
31  
32  
33  
34  
35  
36  
37  
38  
39  
40  
41  
42  
43  
44  
45  
46  
47  
48  
49  
50  
51  
52  
53  
54  
55  
56  
57  
58  
59  
60

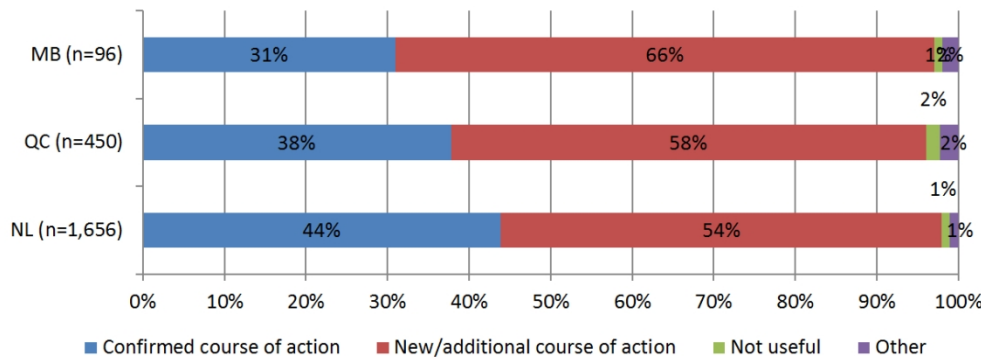

104x40mm (300 x 300 DPI)

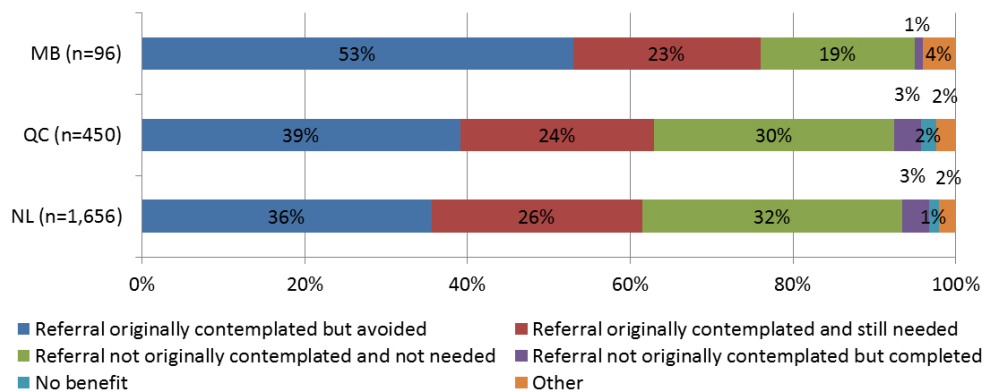

94x39mm (300 x 300 DPI)



1  
2  
3  
4  
5  
6  
7  
8  
9  
10  
11  
12  
13  
14  
15  
16  
17  
18  
19  
20  
21  
22  
23  
24  
25  
26  
27  
28  
29  
30  
31  
32  
33  
34  
35  
36  
37  
38  
39  
40  
41  
42  
43  
44  
45  
46  
47  
48  
49  
50  
51  
52  
53  
54  
55  
56  
57  
58  
59  
60

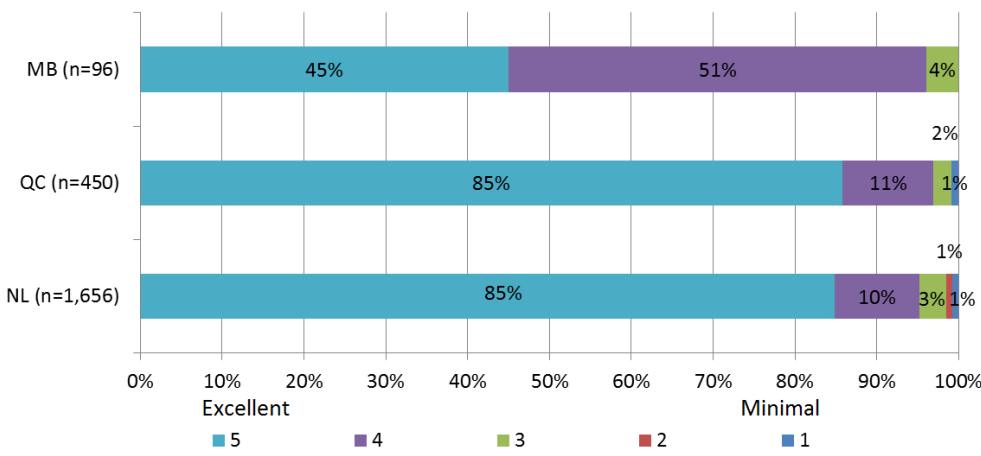

97x45mm (300 x 300 DPI)

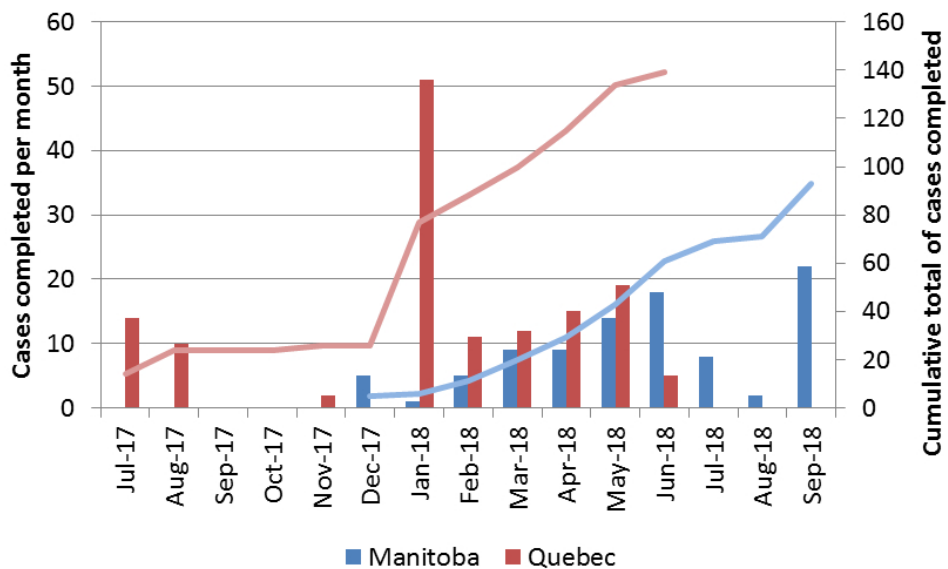

72x43mm (300 x 300 DPI)

1  
2  
3  
4  
5  
6  
7  
8  
9  
10  
11  
12  
13  
14  
15  
16  
17  
18  
19  
20  
21  
22  
23  
24  
25  
26  
27  
28  
29  
30  
31  
32  
33  
34  
35  
36  
37  
38  
39  
40  
41  
42  
43  
44  
45  
46  
47  
48  
49  
50  
51  
52  
53  
54  
55  
56  
57  
58  
59  
60

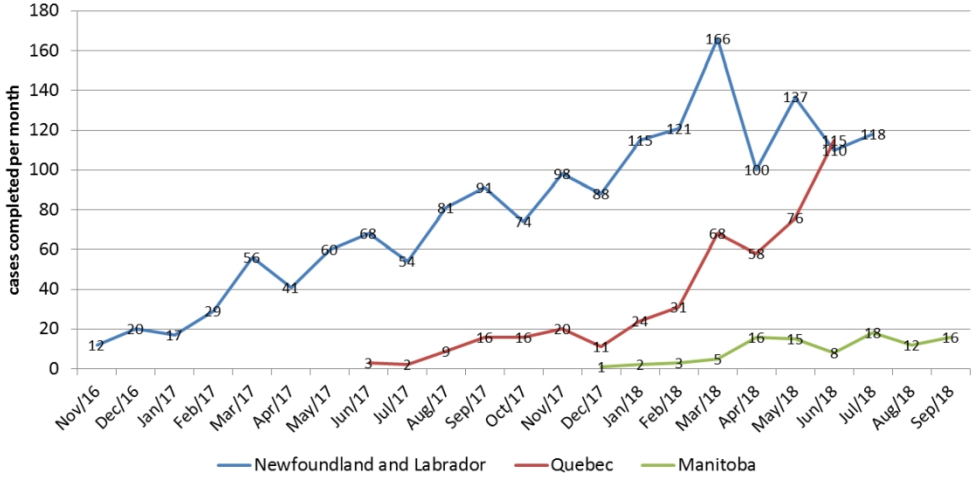

109x54mm (300 x 300 DPI)

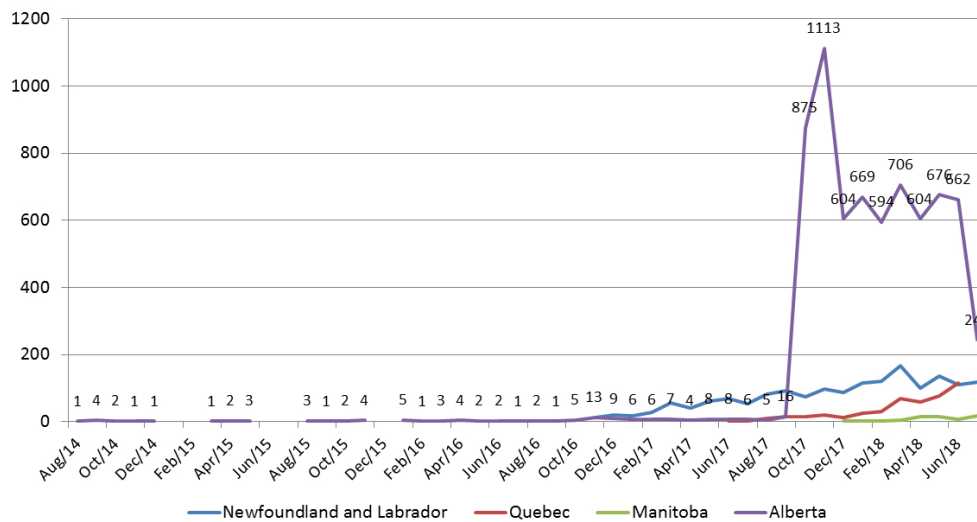

98x51mm (300 x 300 DPI)

**Appendix A.** A description of the five dimensions of care outlined by the RE-Aim framework

| RE-AIM Dimension                                                                 | Definition                                                                                                                                                          | Metrics requested                                                                                                                                                                                                                                                                                                                                                                     |
|----------------------------------------------------------------------------------|---------------------------------------------------------------------------------------------------------------------------------------------------------------------|---------------------------------------------------------------------------------------------------------------------------------------------------------------------------------------------------------------------------------------------------------------------------------------------------------------------------------------------------------------------------------------|
| <b>Reach</b> into the target population                                          | The absolute number, proportion, and representativeness of individuals who are willing to participate in a given initiative, intervention, or program.              | <ul style="list-style-type: none"> <li>• Total number of cases completed:</li> <li>• Number of specialties available</li> <li>• Distribution of cases across specialties (i.e. how many cases went to each specialty)</li> </ul>                                                                                                                                                      |
| <b>Effectiveness</b> or efficacy                                                 | The impact of an intervention on important outcomes, including potential negative effects, quality of life, and economic outcomes.                                  | <ul style="list-style-type: none"> <li>• Number of days between a case being submitted and a specialist responding (median and 75 percentile)</li> <li>• Proportion of advice on new/additional action (survey Q1)</li> <li>• Whether a referral was originally considered and/or ultimately provided (response to survey Q2)</li> </ul>                                              |
| <b>Adoption</b> by target settings, institutions and staff                       | The absolute number, proportion, and representativeness of settings and intervention agents (people who deliver the program) who are willing to initiate a program. | <ul style="list-style-type: none"> <li>• Number of PCPs who joined the service</li> <li>• Proportion of PCPs who submitted <math>\geq 1</math> case</li> <li>• Number of clinics with participating PCPs</li> <li>• Number of cities/towns with participating PCPs</li> <li>• Number of specialists who joined the service</li> <li>• Number of specialty groups available</li> </ul> |
| <b>Implementation</b> consistency, costs and adaptations made during delivery    | The consistency and fidelity to the program protocol, the costs and adaptations made during delivery.                                                               | <ul style="list-style-type: none"> <li>• Steps taken to facilitate replication of eConsult in new jurisdiction (e.g. establishing partnerships, addressing privacy issues, physician engagement, and payment)</li> </ul>                                                                                                                                                              |
| <b>Maintenance</b> of intervention effects in individuals and settings over time | The extent to which a program or policy becomes institutionalized or part of the routine organizational practices and policies.                                     | <ul style="list-style-type: none"> <li>• Number of cases completed over time (e.g. monthly case volume)</li> <li>• Number of PCPs who joined the service during the one year period</li> <li>• Evidence of sustainment and expansion (e.g. funding, new partnerships)</li> </ul>                                                                                                      |

STROBE Statement—Checklist of items that should be included in reports of *cross-sectional studies*

|                           | Item No | Recommendation                                                                                                                                                                                               | Page    |
|---------------------------|---------|--------------------------------------------------------------------------------------------------------------------------------------------------------------------------------------------------------------|---------|
| <b>Title and abstract</b> | 1       | (a) Indicate the study's design with a commonly used term in the title or the abstract                                                                                                                       | 1       |
|                           |         | (b) Provide in the abstract an informative and balanced summary of what was done and what was found                                                                                                          | 2-3     |
| <b>Introduction</b>       |         |                                                                                                                                                                                                              |         |
| Background/rationale      | 2       | Explain the scientific background and rationale for the investigation being reported                                                                                                                         | 4-5     |
| Objectives                | 3       | State specific objectives, including any prespecified hypotheses                                                                                                                                             | 6       |
| <b>Methods</b>            |         |                                                                                                                                                                                                              |         |
| Study design              | 4       | Present key elements of study design early in the paper                                                                                                                                                      | 6       |
| Setting                   | 5       | Describe the setting, locations, and relevant dates, including periods of recruitment, exposure, follow-up, and data collection                                                                              | 6       |
| Participants              | 6       | (a) Give the eligibility criteria, and the sources and methods of selection of participants                                                                                                                  | 7       |
| Variables                 | 7       | Clearly define all outcomes, exposures, predictors, potential confounders, and effect modifiers. Give diagnostic criteria, if applicable                                                                     | 7       |
| Data sources/measurement  | 8*      | For each variable of interest, give sources of data and details of methods of assessment (measurement). Describe comparability of assessment methods if there is more than one group                         | 7       |
| Bias                      | 9       | Describe any efforts to address potential sources of bias                                                                                                                                                    | n/a     |
| Study size                | 10      | Explain how the study size was arrived at                                                                                                                                                                    | 7       |
| Quantitative variables    | 11      | Explain how quantitative variables were handled in the analyses. If applicable, describe which groupings were chosen and why                                                                                 | n/a     |
| Statistical methods       | 12      | (a) Describe all statistical methods, including those used to control for confounding                                                                                                                        | 7       |
|                           |         | (b) Describe any methods used to examine subgroups and interactions                                                                                                                                          | n/a     |
|                           |         | (c) Explain how missing data were addressed                                                                                                                                                                  | 7       |
|                           |         | (d) If applicable, describe analytical methods taking account of sampling strategy                                                                                                                           | n/a     |
|                           |         | (e) Describe any sensitivity analyses                                                                                                                                                                        | n/a     |
| <b>Results</b>            |         |                                                                                                                                                                                                              |         |
| Participants              | 13*     | (a) Report numbers of individuals at each stage of study—eg numbers potentially eligible, examined for eligibility, confirmed eligible, included in the study, completing follow-up, and analysed            | 8       |
|                           |         | (b) Give reasons for non-participation at each stage                                                                                                                                                         | n/a     |
|                           |         | (c) Consider use of a flow diagram                                                                                                                                                                           | n/a     |
| Descriptive data          | 14*     | (a) Give characteristics of study participants (eg demographic, clinical, social) and information on exposures and potential confounders                                                                     | 9       |
|                           |         | (b) Indicate number of participants with missing data for each variable of interest                                                                                                                          | Table 1 |
| Outcome data              | 15*     | Report numbers of outcome events or summary measures                                                                                                                                                         | 9-12    |
| Main results              | 16      | (a) Give unadjusted estimates and, if applicable, confounder-adjusted estimates and their precision (eg, 95% confidence interval). Make clear which confounders were adjusted for and why they were included | 9-12    |

|                          |    |                                                                                                                                                                            |      |
|--------------------------|----|----------------------------------------------------------------------------------------------------------------------------------------------------------------------------|------|
|                          |    | (b) Report category boundaries when continuous variables were categorized                                                                                                  | n/a  |
|                          |    | (c) If relevant, consider translating estimates of relative risk into absolute risk for a meaningful time period                                                           | n/a  |
| Other analyses           | 17 | Report other analyses done—eg analyses of subgroups and interactions, and sensitivity analyses                                                                             | 9-12 |
| <b>Discussion</b>        |    |                                                                                                                                                                            |      |
| Key results              | 18 | Summarise key results with reference to study objectives                                                                                                                   | 13   |
| Limitations              | 19 | Discuss limitations of the study, taking into account sources of potential bias or imprecision. Discuss both direction and magnitude of any potential bias                 | 15   |
| Interpretation           | 20 | Give a cautious overall interpretation of results considering objectives, limitations, multiplicity of analyses, results from similar studies, and other relevant evidence | 15   |
| Generalisability         | 21 | Discuss the generalisability (external validity) of the study results                                                                                                      | 15   |
| <b>Other information</b> |    |                                                                                                                                                                            |      |
| Funding                  | 22 | Give the source of funding and the role of the funders for the present study and, if applicable, for the original study on which the present article is based              | 16   |

\*Give information separately for exposed and unexposed groups.

**Note:** An Explanation and Elaboration article discusses each checklist item and gives methodological background and published examples of transparent reporting. The STROBE checklist is best used in conjunction with this article (freely available on the Web sites of PLoS Medicine at <http://www.plosmedicine.org/>, Annals of Internal Medicine at <http://www.annals.org/>, and Epidemiology at <http://www.epidem.com/>). Information on the STROBE Initiative is available at [www.strobe-statement.org](http://www.strobe-statement.org).

# BMJ Open

## Supporting the Spread and Scale-up of electronic consultation across Canada: a cross-sectional analysis

|                                 |                                                                                                                                                                                                                                                                                                                                                                                                                                                                                                                                                                                                                                                                                                                                                                                                                                                                                        |
|---------------------------------|----------------------------------------------------------------------------------------------------------------------------------------------------------------------------------------------------------------------------------------------------------------------------------------------------------------------------------------------------------------------------------------------------------------------------------------------------------------------------------------------------------------------------------------------------------------------------------------------------------------------------------------------------------------------------------------------------------------------------------------------------------------------------------------------------------------------------------------------------------------------------------------|
| Journal:                        | <i>BMJ Open</i>                                                                                                                                                                                                                                                                                                                                                                                                                                                                                                                                                                                                                                                                                                                                                                                                                                                                        |
| Manuscript ID                   | bmjopen-2018-028888.R2                                                                                                                                                                                                                                                                                                                                                                                                                                                                                                                                                                                                                                                                                                                                                                                                                                                                 |
| Article Type:                   | Research                                                                                                                                                                                                                                                                                                                                                                                                                                                                                                                                                                                                                                                                                                                                                                                                                                                                               |
| Date Submitted by the Author:   | 20-Mar-2019                                                                                                                                                                                                                                                                                                                                                                                                                                                                                                                                                                                                                                                                                                                                                                                                                                                                            |
| Complete List of Authors:       | Liddy, Clare; Elisabeth Bruyere Research Institute, C.T. Lamont Primary Health Care<br>Bello, A; University of Alberta, Edmonton, Alberta, Canada. , Medicine<br>Cook, Jean; Newfoundland and Labrador Medical Association<br>Drimer, Neil; Canadian Foundation for Healthcare Improvement<br>Dumas Pilon, Maxine; McGill University, Family Medicine<br>Farrell, Gerard; Memorial University of Newfoundland, Family Medicine<br>Glassford, Jodi; Alberta Health Services<br>Ireland, Laurie; Nine Circles Community Health Centre<br>McDonald, Rana; Nine Circles Community Health Centre<br>Nabelsi, Véronique; Université du Quebec<br>Oppenheimer, Luis; University of Manitoba, Surgery<br>Singer , Alexander; University of Manitoba College of Medicine, Department of Family Medicine ; Manitoba Primary Care Research Network<br>Keely, Erin; University of Ottawa, Medicine |
| <b>Primary Subject Heading</b>: | General practice / Family practice                                                                                                                                                                                                                                                                                                                                                                                                                                                                                                                                                                                                                                                                                                                                                                                                                                                     |
| Secondary Subject Heading:      | Health policy                                                                                                                                                                                                                                                                                                                                                                                                                                                                                                                                                                                                                                                                                                                                                                                                                                                                          |
| Keywords:                       | PRIMARY CARE, eConsult, Referral, Access to care, Wait times                                                                                                                                                                                                                                                                                                                                                                                                                                                                                                                                                                                                                                                                                                                                                                                                                           |
|                                 |                                                                                                                                                                                                                                                                                                                                                                                                                                                                                                                                                                                                                                                                                                                                                                                                                                                                                        |

SCHOLARONE™  
Manuscripts



## Supporting the Spread and Scale-up of electronic consultation across Canada: a cross-sectional analysis

Clare Liddy, MD, MSc, CCFP, FCFP<sup>1,2</sup>

[cliddy@bruyere.org](mailto:cliddy@bruyere.org)

Aminu Bello, MD, PhD, FRCP, FACP, FASN<sup>3</sup>

[aminu1@ualberta.ca](mailto:aminu1@ualberta.ca)

Jean Cook<sup>4</sup>

[JCook@nlma.nl.ca](mailto:JCook@nlma.nl.ca)

Neil Drimer, MHSc, CHE<sup>5</sup>

[Neil.Drimer@cfhi-fcass.ca](mailto:Neil.Drimer@cfhi-fcass.ca)

Maxine Dumas Pilon, MD<sup>6</sup>

[maxine.dumaspilon@mcgill.ca](mailto:maxine.dumaspilon@mcgill.ca)

Gerard Farrell, MD<sup>7</sup>

[gfarrell@mun.ca](mailto:gfarrell@mun.ca)

Jodi Glassford<sup>8</sup>

[Jodi.Glassford@ahs.ca](mailto:Jodi.Glassford@ahs.ca)

Laurie Ireland, MD, CCFP<sup>9</sup>

[Lireland@nynecircles.ca](mailto:Lireland@nynecircles.ca)

Rana McDonald, MA<sup>9</sup>

[RMcDonald@nynecircles.ca](mailto:RMcDonald@nynecircles.ca)

Véronique Nabelsi, MScA, PhD<sup>10</sup>

[veronique.nabelsi@uqo.ca](mailto:veronique.nabelsi@uqo.ca)

Luis Oppenheimer, MD, PhD, FRCS(C), FACS, CCFP(hon.)<sup>11</sup>

[loppenheimer@hsc.mb.ca](mailto:loppenheimer@hsc.mb.ca)

Alex Singer, MD, BAO, BCh, CCFP<sup>12</sup>

[alexandersinger@gmail.com](mailto:alexandersinger@gmail.com)

Erin Keely, MD FRCPC<sup>13, 14</sup>

[ekeely@toh.ca](mailto:ekeely@toh.ca)

<sup>1</sup>C.T. Lamont Primary Health Care Research Centre, Department of Family Medicine, University of Ottawa, Ottawa, Ontario, Canada

<sup>2</sup> Bruyère Research Institute, Ottawa, Ontario, Canada

<sup>3</sup>Department of Medicine, University of Alberta, Calgary, Alberta, Canada

<sup>4</sup>Newfoundland and Labrador Medical Association, St. John's, Newfoundland and Labrador, Canada

<sup>5</sup>Canadian Foundation for Healthcare Improvement, Ottawa, Ontario, Canada

<sup>6</sup>Department of Family Medicine, McGill University, Montreal, Quebec, Canada

<sup>7</sup>Department of Family Medicine, Memorial University, St. John's, Newfoundland and Labrador, Canada

<sup>8</sup>Alberta Referral Pathways, Calgary, Alberta, Canada

<sup>9</sup>Nine Circles Community Health Centre, Winnipeg, Manitoba, Canada

<sup>10</sup>Université du Québec en Outaouais, Gatineau, Quebec, Canada

<sup>11</sup>Department of Surgery, University of Manitoba, Winnipeg, Manitoba, Canada

<sup>12</sup>Department of Family Medicine, University of Manitoba, Winnipeg, Manitoba, Canada

<sup>13</sup>Department of Medicine, University of Ottawa, Ottawa, Ontario, Canada

<sup>14</sup>Division of Endocrinology/Metabolism, The Ottawa Hospital, Ottawa, Ontario, Canada

Corresponding author at:

Clare Liddy

Bruyère Research Institute

43 Bruyère St, Annex E, Room 106

Ottawa, ON K1N 5C8

Tel.: 613- 562-6262 ext. 2928

Fax: 613-562-6099

e-mail: [cliddy@bruyere.org](mailto:cliddy@bruyere.org)

## Abstract

**Objective:** To examine the process of implementing an electronic consultation (eConsult) service and evaluate its impact along key metrics outlined by the RE-AIM framework.

**Design:** Cross-sectional study.

**Setting:** Clinics using eConsult in four provinces across Canada: Alberta, Manitoba, Quebec, and Newfoundland and Labrador.

**Participants:** All eConsult cases submitted in four participating provinces were included.

**Intervention:** The eConsult service is a secure online application that allows primary care providers and specialists to communicate regarding a patient's care. We measured impact using system utilization data and mandatory close-out surveys completed at the end of each eConsult.

**Main outcome measures:** Implementation progress and impact were examined using the five categories outlined by the RE-AIM framework: reach, effectiveness, adoption, implementation, and maintenance.

**Results:** Four provinces provided data from different periods, ranging from four years (Alberta) to ten months (Manitoba). Total cases completed ranged from 96 (Manitoba) to 6,885 (Alberta). Newfoundland had the largest menu of available specialties (n=35), while Alberta and Quebec had the smallest (n=22). The most frequently requested groups varied across provinces, with only endocrinology appearing in the top five for all provinces. The average specialist response time ranged from 3 days (Manitoba) to 16.7 days (Alberta). Between 54% (Newfoundland) and 66% (Manitoba) of cases resulted in new or additional information. Primary care providers avoided completing referrals they had originally considered in 36% (Newfoundland) to 53% of cases (Manitoba), while only between 27% (Quebec) and 29% (Newfoundland) of cases resulted

1  
2  
3 in a referral. In every province, services demonstrated higher rates of usage in their last quarter  
4  
5 of data than their first.  
6

7  
8 **Conclusions:** eConsult was successfully implemented in four new provinces across Canada.  
9

10 Implementation strategies and scope varied, but services demonstrated substantial consistency on  
11  
12 several key metrics, most notably on whether new information was learned and impact on  
13  
14 decision to refer.  
15

16  
17 **Keywords:** Primary care; eConsult; referral; access to care; wait times.  
18  
19

## 20 21 **Article Summary**

### 22 *Strengths and limitations of this study*

- 23  
24 • Study data spans four provinces and multiple regions, allowing for a robust examination  
25  
26 of eConsult's generalizability and scalability.  
27
- 28 • The data included was observational and clinician based, which does not allow for a  
29  
30 direct patient perspective.  
31  
32
- 33 • Differences in service structure and data collection meant some metrics could not be  
34  
35 captured across all participating services.  
36  
37  
38  
39  
40  
41  
42  
43  
44  
45  
46  
47  
48  
49  
50  
51  
52  
53  
54  
55  
56  
57  
58  
59  
60

## Introduction

Excessive wait times for specialist care are a serious issue across Canada.(1;2) In the 2016 Commonwealth Fund survey, Canada placed last on the measure of specialist access among eleven countries surveyed, with 56% of Canadians reporting wait times of more than four weeks for a specialist appointment ,versus an average of 36% across all participating countries.(1) Studies assessing specialist wait times across Canada have reported median wait times ranging from five to eleven weeks,(3-6) with median wait for some high-demand specialties (e.g. infectious diseases) reaching up to 24 weeks.(6) Poor access to specialist advice has serious consequences, reducing patients' ability to carry out day-to-day activities, increasing anxiety, and potentially causing an overall deterioration in health.(2) On a health service level, long wait times result in delayed diagnoses, duplicated testing, and dissatisfaction among health care providers—factors that increase costs while reducing quality of care.(7)

In an effort to address this issue, the Champlain BASE™ (Building Access to Specialists through eConsultation) eConsult service was launched in 2010. The BASE™ model of care is a method of care delivery designed to improve access to specialist advice by allowing primary care providers (PCP) to send questions concerning patient care to specialists. It is not a specific technology, and can be adopted on any digital platform capable of facilitating secure communication between PCPs and specialists. In the BASE™ model of care, PCPs seeking specialist advice on a patient's care log onto their platform and select a specialty group (as opposed to an individual specialist). A case assigner allocates the eConsult to an appropriate specialist based on availability. The specialist responds to the PCP's question within one week by providing advice on how to manage the patient, recommending the patient receive a face-to-face referral (not necessarily with them), or requesting additional information. PCPs can ask

1  
2  
3 additional questions. Specialties are added to the service based on PCP requests, and the service  
4  
5 undergoes continual evaluation to ensure quality and seek user feedback.  
6

7  
8 Launched as a small proof-of-concept and soon expanded to a full pilot in the Champlain  
9  
10 health region of Eastern Ontario, Canada, the eConsult service has completed over 50,000  
11  
12 eConsults, enrolled more than 1,400 PCPs, and provides access to 114 specialty groups.  
13  
14 Specialists respond to cases in a median of 1.9 days, and over two-thirds of cases are resolved  
15  
16 without the patient requiring a face-to-face specialist visit.(8) Given its success on a regional  
17  
18 level, the eConsult team engaged in efforts to expand the service to new jurisdictions. However,  
19  
20 Canada faces a number of barriers to successful scale-up, resulting in many projects being unable  
21  
22 to expand beyond their pilot phase.(9;10) In order to avoid these pitfalls, we successfully sought  
23  
24 grants from the Canadian Institutes of Health Research. Through this process, the eConsult team  
25  
26 formed key partnerships with provincial and national organizations in order to support its  
27  
28 expansion to new jurisdictions within Ontario(11) and across provinces. As part of this initiative,  
29  
30 multiple eConsult teams based in their own jurisdictions worked closely with the Canadian  
31  
32 Foundation for Healthcare Improvement (CHFI), which supported eConsult's spread and scale  
33  
34 through a two-phase Connected Medicine Collaborative (Figure 1).  
35  
36  
37  
38  
39

40 Phase 1 of the Collaborative recruited 10 teams from across Canada and internationally  
41  
42 to participate in a 9-month Access to Specialist eConsult Collaborative, in which teams aimed to  
43  
44 develop business cases and strategies to implement one of two remote consult services in their  
45  
46 jurisdictions: the Champlain BASE™ eConsult service, and the telephone-based Rapid Access to  
47  
48 Consultative Expertise (RACE) service.(12) CFHI supported teams by facilitating sharing of  
49  
50 information and hosting multiple online and face-to-face touchpoints with the innovators and  
51  
52 new implementation sites. Phase 2 built on the previous initiative to launch a 15-month Quality  
53  
54  
55  
56  
57  
58  
59  
60

1  
2  
3 Improvement Collaborative, with 11 teams in 7 provinces participating.<sup>(13)</sup> As a result of these  
4 initiatives, eConsult services have been launched in Alberta, Manitoba, Quebec, Newfoundland  
5 and Labrador, and New Brunswick. Throughout this process, the teams have encountered various  
6 challenges and learned a number of important lessons, which will be relevant to those seeking to  
7 spread, scale and sustain health care innovations.  
8  
9  
10  
11  
12  
13

14  
15 In this study, we examine the process of implementing eConsult in four Canadian  
16 provinces, and evaluate their impact along key metrics outlined by the RE-AIM framework.  
17  
18

## 19 **Methods**

### 20 *Design*

21  
22 This study involves a cross-sectional analysis of data from eConsult services implemented in  
23 four provinces across Canada.  
24  
25  
26  
27

### 28 *Setting*

29  
30 In order to evaluate the impact of eConsult's replication, this study draws data from eConsult  
31 services in Alberta (AB), Manitoba (MB), Quebec (QC), and Newfoundland and Labrador (NL).  
32  
33 Services in three of these provinces (MB, QC, NL) operate using a platform identical to the  
34 BASE™ model of care, which was first developed in Ottawa, Ontario in 2009. The remaining  
35 province (AB) incorporated an eReferral service with eConsult capabilities similar principles to  
36 the BASE model into its provincial electronic health record, called Alberta Netcare, in 2014.  
37  
38 While an eConsult service has been implemented in New Brunswick using the BASE™ model,  
39 the service had only minimal data at the time of this study and was thus excluded.  
40  
41  
42  
43  
44  
45  
46  
47  
48

49 The Canadian healthcare system is publically funded, and provides universal access to a  
50 host of clinical services, including primary care, specialty care, and emergency medicine. Other  
51 elements of healthcare, such as pharmaceuticals and allied health services, are not universally  
52  
53  
54  
55  
56  
57  
58  
59  
60

1  
2  
3 funded. While the federal government provides funding, each province and territory is  
4  
5 responsible for overseeing the administration of healthcare in its jurisdiction, with the exception  
6  
7 of some specialty populations where care is managed federally (e.g. First Nations communities,  
8  
9 members of the military, and inmates of federal penitentiaries). As such, the exact healthcare  
10  
11 context varies slightly between the provinces participating in this study.  
12  
13

### 14 ***RE-AIM framework***

15  
16 As part of our CIHR-funded activities to explore the factors critical to eConsult's successful  
17  
18 adoption, we utilized the RE-AIM framework to assess eConsult's impact based on five criteria:  
19  
20 1) Reach into the target population; 2) Effectiveness or efficacy; 3) Adoption by target settings,  
21  
22 institutions and staff; 4) Implementation, including its consistency and costs of delivery; and 5)  
23  
24 Maintenance of intervention effects in individuals and settings over time.<sup>(14)</sup> A description of  
25  
26 each criterion and its associated metrics is included in Appendix A.  
27  
28  
29

### 30 ***Participants***

31  
32 This study includes aggregated information from eConsult cases completed in the four  
33  
34 participating provincial services.  
35  
36

### 37 ***Analysis***

38  
39 Each participating province contributed data collected by the service. This includes utilization  
40  
41 data collected automatically (e.g. specialty group submitted to, response time) and responses to  
42  
43 surveys completed at the conclusion of each case. The AB service does not include a closeout  
44  
45 survey, so was exempted from metrics that relied on survey data. Data reporting periods varied  
46  
47 between provinces out of necessity, as provinces implemented eConsult at different points in  
48  
49 time. Where possible, at least one year of data was included. A complete list of data metrics  
50  
51 available from each service is presented in Table 1.  
52  
53  
54  
55  
56  
57  
58  
59  
60

**Table 1.** Data available for analysis from each of the four participating services.

| <b>Data Metric</b>                                               | <b>AB</b> | <b>MB</b> | <b>QC</b> | <b>NL</b> |
|------------------------------------------------------------------|-----------|-----------|-----------|-----------|
| <b>Reach</b>                                                     |           |           |           |           |
| Total number of cases completed                                  | X         | X         | X         | X         |
| Number of specialties available                                  | X         | X         | X         | X         |
| Top five most frequently requested specialties                   | X         | X         | X         | X         |
| <b>Effectiveness</b>                                             |           |           |           |           |
| Average specialist response time                                 | X         | X         | X         | X         |
| Proportion of advice on new/additional action                    |           | X         | X         | X         |
| Whether a referral was originally considered/ultimately provided |           | X         | X         | X         |
| PCP satisfaction                                                 |           | X         | X         | X         |
| <b>Adoption</b>                                                  |           |           |           |           |
| Number of PCPs who joined the service                            | X         | X         | X         | X         |
| Number of clinics with participating PCPs                        |           | X         | X         |           |
| Number of cities/towns with participating PCPs                   | X         | X         | X         | X         |
| Number of specialists who joined the service                     |           | X         | X         | X         |
| PCP enrollment by month                                          |           | X         | X         |           |
| Proportion of active PCPs (submitted $\geq 1$ case)              |           | X         | X         | X         |
| <b>Implementation</b>                                            |           |           |           |           |
| Hosts and Key Partners                                           | X         | X         | X         | X         |
| Platform                                                         | X         | X         | X         | X         |
| Payment model                                                    | X         | X         | X         | X         |
| <b>Maintenance</b>                                               |           |           |           |           |
| Number of cases completed over time (e.g. monthly case volume)   | X         | X         | X         | X         |
| Number of PCPs who joined the service during the one year period |           | X         | X         |           |

AB = Alberta; MB = Manitoba; QC = Quebec, NL = Newfoundland and Labrador

### **Ethics**

The Ottawa Health Science Network and Bruyère Research Ethics Boards provided ethics approval for this project.

### **Patient and Public Involvement**

Patient representatives are an important part of eConsult's decision-making team, and inclusion of patient voices has been a cornerstone of the service's process of evaluation and dissemination of knowledge.<sup>(15)</sup> However, this study did not draw on direct patient data, but instead relied on



aggregate utilization data and survey responses from PCPs. Patient involvement in this particular study was therefore limited.

## Results

### *Reach*

The reporting period for the study varied between provinces. MB had the shortest reporting period, with data from December 2017 to September 2018, while AB had the longest, with data from August 2014 to July 2018. The total number of cases completed ranged from 96 cases (MB) to 6,885 cases (AB). When expressed as population rates in the first year of implementation, PCPs completed 1.14 eConsults per 1000 people in NL, 0.04 eConsults per 1000 people in Quebec, 0.07 eConsults per 1000 people in Manitoba, and 0.0035 eConsults per 1000 people in Alberta. Data on the number of cases completed, population rates, and providers enrolled is listed in Table 2.

**Table 2.** The data reporting period, number of cases completed , and specialties available for eConsult services across provinces

|                                        | Alberta             | Manitoba            | Quebec              | Newfoundland and Labrador |
|----------------------------------------|---------------------|---------------------|---------------------|---------------------------|
| <b>Data reporting period</b>           | Jan 2014 – Mar 2018 | Dec 2017 – Sep 2018 | Jul 2017 – Jun 2018 | Sep 2016 – Jul 2018       |
| <b># cases completed</b>               | 6,885               | 96                  | 450                 | 1,656                     |
| <b># cases completed in first year</b> | 15                  | 96                  | 334                 | 603                       |
| <b>Population of province(16)</b>      | 4,286,134           | 1,338,109           | 8,394,034           | 528,817                   |
| <b># eConsults/ 1000 people</b>        | 0.0035              | 0.07                | 0.04                | 1.14                      |
| <b># PCPs enrolled</b>                 | 1,446               | 93                  | 139                 | 191                       |
| <b># specialists enrolled</b>          |                     | 31                  | 55                  | 56                        |
| <b># specialties</b>                   | 22                  | 25                  | 22                  | 35                        |

| available                                                 |                                                                                                                                                    |                                                                                                                                                                                                              |                                                                                                                                                         |                                                                                                                                                     |
|-----------------------------------------------------------|----------------------------------------------------------------------------------------------------------------------------------------------------|--------------------------------------------------------------------------------------------------------------------------------------------------------------------------------------------------------------|---------------------------------------------------------------------------------------------------------------------------------------------------------|-----------------------------------------------------------------------------------------------------------------------------------------------------|
| <b>Average response time (days)</b>                       | 16.7                                                                                                                                               | 3                                                                                                                                                                                                            | 4                                                                                                                                                       | 3.5                                                                                                                                                 |
| <b>Top 5 most frequent specialties referred to (N[%])</b> | 1. urology (n=6,400, 93%)<br>2. gastroenterology (n=122, 2%)<br>3. nephrology (n=117, 2%)<br>4. endocrinology (n=73, 1%)<br>5. oncology (n=46, 1%) | 1. dermatology (n=28, 29%)<br>2. hepatology (n=14, 15%)<br>3. cardiology (n=13, 14%)<br>4. hematology (n=8, 8%)<br>5a. allergy medicine (n=5, 5%)<br>5b. endocrinology (n=5, 5%)<br>5c. nephrology (n=5, 5%) | 1. internal medicine (n=101, 22%)<br>2. dermatology (n=82, 19%)<br>3. obstetrics (n=64, 15%)<br>4. endocrinology (n=39, 9%)<br>5. psychiatry (n=32, 7%) | 1. hematology (n=184, 11%)<br>2. neurology (n=167, 10%)<br>3. cardiology (n=161, 10%)<br>4. endocrinology (n=148, 9%)<br>5. dermatology (n=142, 9%) |

PCP = primary care provider

Services offered a range of specialties, with NL offering the greatest variety (n=35), and AB and QC the least (n=22). The most frequently requested groups varied across provinces. Only endocrinology appeared in the top five specialties across all provinces (Table 1). The top ten most frequently referred to specialties across services are displayed in Figure 2.

### *Effectiveness*

The average specialist response time ranged from 3 days (MB) to 16.7 days (AB). Between 54% (NL) and 66% (MB) of cases resulted in the PCP getting new or additional information to use in their patient's treatment (Figure 3). PCPs avoided completing referrals they had originally considered in 36% (NL) to 53% of cases (MB), while only between 24% (MB) and 29% (NL) of cases resulted in patients still requiring a referral (Figure 4). Furthermore, in a small number of cases (QC, NL: 3%; MB: 1%), PCPs had not originally considered a referral but implemented one based on specialist advice.

1  
2  
3 Across all services where PCP survey data was collected, PCPs expressed high levels of  
4 satisfaction with the eConsult service. PCPs ranked specialists' responses as high or very high  
5 value for their patients in 96% (QC), 95% (NL), and 96% (MB) of cases (Figure 5).  
6  
7

### 8 9 ***Adoption***

10 Services from each province varied in scope. As the most recently implemented service  
11 (launched in December 2017), the MB service was also the smallest, with 93 PCPs enrolled  
12 across 18 clinics in 9 municipalities, and 31 practicing specialists. The QC service enrolled 139  
13 PCPs, who practiced in 11 clinics across three different regions (Outaouais, Abitibi, and  
14 Maurice), as well as 55 specialists practicing in 3 specialty clinics. The NL service demonstrated  
15 the broadest scope of adoption among services using the BASE™ model, with 252 enrolled  
16 PCPs practicing in 33 municipalities across the province, and 56 participating specialists. The  
17 AB service was the largest overall, with 1,446 participating PCPs across 46 municipalities. PCP  
18 enrollment over time is presented in Figure 6.  
19  
20  
21  
22  
23  
24  
25  
26  
27  
28  
29  
30  
31  
32

33 Of the 93 PCPs enrolled in the MB service, 32% (n=30) were active users, meaning they  
34 had submitted at least one case. QC demonstrated a similar rate of active users, with 33% (n=44)  
35 of the 135 enrolled PCPs submitting at least one case. NL showed a higher ratio of active users,  
36 with 56% (n=140) of enrolled PCPs deemed active.  
37  
38  
39  
40  
41

### 42 ***Implementation***

43 The implementation strategy for each province varied based on the needs of its population and  
44 the infrastructure already in place. Each service partnered with regional and provincial groups  
45 capable of hosting the service and expanding it to new jurisdictions (Table 3). In MB and NL,  
46 the BASE™ platform was replicated directly and provided as part of CIHR funded grants,  
47 following the template laid in the Champlain region and using the same software (Microsoft  
48  
49  
50  
51  
52  
53  
54  
55  
56  
57  
58  
59  
60

SharePoint). By contrast, QC adopted the BASE™ model of managed care, but built the service on the Enterprise Telehealth Platform already in operation on the Quebec Healthcare Network in order to leverage existing infrastructure. AB incorporated eConsult into Alberta Netcare, the electronic health record responsible for storing patients' health information province-wide.

Methods for payment vary between provinces. In AB, providers are compensated by submitting fee codes in the same manner as other services, with separate codes and rates established for referring (\$32.43) and responding (\$76.27) providers. In the other provinces, fee codes are either not available (QC, NL) or too low to adequately support the service (MB). Payment is thus provided through the service, with specialists earning \$200 per hour prorated to the length of time spent answering the case.

**Table 3.** Details on the platform, host organization, and payment models for participating eConsult services.

|                               | <b>Alberta</b>                                 | <b>Manitoba</b>                                                                              | <b>Quebec</b>                                                                                                                   | <b>Newfoundland and Labrador</b>                                                                                                                 |
|-------------------------------|------------------------------------------------|----------------------------------------------------------------------------------------------|---------------------------------------------------------------------------------------------------------------------------------|--------------------------------------------------------------------------------------------------------------------------------------------------|
| <b>Hosts and Key Partners</b> | AB Health Services, AB Health                  | Shared Health Services Manitoba, eHealth Manitoba, Research Manitoba, University of Manitoba | Télésanté Ruis McGill, Centre Intégré de Santé et de Services Sociaux de l'Outaouais, Collège Québécois des Médecins de Famille | NL Medical Association, Department of Health and Community Services, Memorial University eHealth Research Unit, NL Centre for Health Information |
| <b>Platform</b>               | Orion Health, built within Alberta Netcare     | SharePoint                                                                                   | Enterprise Telehealth Platform, built within Quebec Healthcare Network                                                          | SharePoint                                                                                                                                       |
| <b>Payment model</b>          | Fee codes (\$32.43 referral, \$76.27 response) | Through service (\$200/hour prorated)                                                        | Through service (\$200/hour prorated)                                                                                           | Through service (\$200/hour prorated)                                                                                                            |

AB = Alberta; MB = Manitoba; NL = Newfoundland and Labrador

1  
2  
3 The provincial services have engaged in various activities supporting eConsult's  
4  
5 implementation in their jurisdictions. AB Netcare eReferral engaged in a number of promotional  
6  
7 activities aimed at physicians and clinical support staff, including presentation at local and  
8  
9 provincial conferences, publication through regional authorities (e.g. AB Medical Association,  
10  
11 AB College of Physicians and Surgeons) and service-affiliated websites (e.g. AHS, AB Netcare  
12  
13 eReferral and Calgary Zone Specialist LINK), in-person training, and webinars. The AB team  
14  
15 worked collaboratively with the primary care networks and various specialty groups in the  
16  
17 province to engage physicians to facilitate adoption of eReferral. In MB, activities included  
18  
19 presentations (e.g. Manitoba College of Family Physicians Annual Scientific Assembly, the  
20  
21 University of Manitoba Academic Days), publications (e.g. Manitoba College of Family  
22  
23 Physician's MCFP E\_News Update, Nine Circles Community Health Centers Annual Report),  
24  
25 and outreach to local PCPs and specialists. In QC, activities included outreach to provincial and  
26  
27 national organizations (e.g. Quebec College of Family Physicians, Canada Health Infoway),  
28  
29 presentation at conferences (e.g. Centre intégré de santé et des services sociaux de l'Outaouais  
30  
31 (CISSSCO) Research Day(17)), and publications highlighting eConsult in professional and  
32  
33 popular media (e.g. Réseau-1 Québec,(18) CISSSCO newsletter,(19) Le Droit(20)). In NL,  
34  
35 promotional activities included presentations (e.g., NL Medical Association Annual General  
36  
37 Meeting, Nurse Practitioner's Professional Practice Group NL, Primary Healthcare Partnership  
38  
39 Forum, NL College of Family physicians Annual Scientific Assembly), publications  
40  
41 disseminated through the NL Medical Association (e.g., President Letters, eUpdates, page on the  
42  
43 NL Medical Association website dedicated to eConsult) and outreach to local PCPs and  
44  
45 specialists.  
46  
47  
48  
49  
50  
51  
52

### 53 ***Maintenance***

1  
2  
3 All participating services demonstrated growth of usage during the study period, though case  
4 volumes varied based on the number of users and length of time the service had been established.  
5  
6  
7 Monthly case volumes for MB, QC, and NL are shown in Figure 7; given the substantial  
8 difference in scale between AB and other services, monthly case volumes for AB are charted  
9 separately in Figure 8. In every case, services demonstrated higher rates of usage in their last  
10 quarter of data than their first. In NL, the service completed an average of 16.3 cases/month in its  
11 first quarter of available data versus 121.7 cases/month in its last quarter. In QC, there were 4.7  
12 cases/month in the first quarter versus 83 cases/month in the last quarter. MB's data spanned less  
13 than four full quarters, with 2 cases/month in the first three-month period and 13.6 cases/month  
14 in the last. AB completed 2.3 cases/month in its first quarter and 527 cases/month in its last  
15 quarter.  
16  
17  
18  
19  
20  
21  
22  
23  
24  
25  
26  
27

28 The participating services are at different stages of implementation. AB is a fully  
29 sustained service, integrated into the provincial EMR platform and funded directly by the  
30 province. NL has also entered the sustainability phase, with provincial expansion underway. MB  
31 and QC remain regional services at present, though in both cases discussions regarding  
32 provincial expansion and sustainment are ongoing.  
33  
34  
35  
36  
37  
38  
39

## 40 Discussion

41  
42 eConsult is a promising technology tool designed to reduce wait times to access specialist  
43 advice. Our findings demonstrated eConsult's spread and scale in four provinces across Canada,  
44 with a growing number of Canadians benefiting from rapid access to specialist advice through  
45 eConsult. The implementation process varied between regions based on existing services, local  
46 needs, and clinical champions, allowing us to take a tailored approach that fit each community.  
47  
48  
49  
50  
51  
52  
53  
54 However, once implementation began, the services demonstrated a common pattern of growth,  
55  
56  
57  
58  
59  
60

1  
2  
3 reported similar response times and case outcomes, and delivered similarly high levels of  
4  
5 provider satisfaction. In all cases, the median response time was far shorter than the five to 11  
6  
7 week-long median waits for specialist appointments reported in the literature. Using the RE-AIM  
8  
9 framework allowed us to paint a broad comparative picture of the service in each region.  
10  
11

12 Barriers to spread and scale have limited the adoption of many promising healthcare  
13  
14 innovations. Canada has a reputation of being a “land of perpetual pilot projects,” where  
15  
16 programs are regularly initiated but often fail to expand or sustain themselves beyond their initial  
17  
18 implementation period.(9;10) In their 2015 report, Naylor et al. highlight several barriers to an  
19  
20 innovation’s spread, including a lack of funding tailored to scaling up pilots, too little focus on  
21  
22 patient-centred care, aversion to deploying digital technology, and a fragmented healthcare  
23  
24 system that inadvertently promotes regional siloing.(10)  
25  
26  
27

28 Our team has worked to overcome these barriers through strong and fruitful partnerships  
29  
30 with provincial and national organizations. These groups can provide vital sources for funding,  
31  
32 and support interjurisdictional coordination and knowledge sharing to ensure successful ideas do  
33  
34 not get lost, but have the opportunity to be tested and replicated in new environments. The CFHI  
35  
36 Connected Medicine Collaborative, cited in the introduction of this paper, is a good example.  
37  
38 Launched in 2015, the program has led to the successful implementation of 11 programs across 7  
39  
40 provinces.(12) Much of its success stemmed from taking programs that had demonstrated  
41  
42 effectiveness along key metrics, and allowing motivated groups in other provinces to replicate  
43  
44 them while drawing on the expertise of previous implementers. Beyond the Collaborative, our  
45  
46 team has endeavored to promote knowledge-sharing through our Think Tank and National  
47  
48 Forum, annual events that draw clinicians, patients, and decision-makers from across Canada to  
49  
50 discuss issues pertinent to eConsult’s expansion.(15) The third meeting was held in November  
51  
52  
53  
54  
55  
56  
57  
58  
59  
60

1  
2  
3 2018, with a focus on developing best practices to support the spread of eConsult and eReferral  
4 nation-wide. Patient partners have consistently been well-represented at these events, reflecting  
5  
6 our team's commitment to maintaining a patient-centered approach to care.  
7  
8  
9

10 Some factors, such as the number of cases completed, PCPs enrolled, and specialty  
11 services available, varied substantially between provinces, and are reflected in the provincial  
12 population rates of completed eConsults per 1,000 people during the first year of  
13  
14 implementation. These variations are to be expected, given differences in implementation  
15 strategy, local needs and provider availability, scope, and the fact that some services had been  
16 implemented for a longer period than others—for instance, the AB service included cases from  
17 August 2014 to July 2018, while the MB service was first launched in December 2017 and thus  
18 could only report cases over a 10-month period. The population rates observed in the present  
19 study ranged from 0.0035 to 1.14 eConsults per 1000 people. In the cases of MB, QC, and NL,  
20 this level of usage exceeds that exhibited in the service's first year in the Champlain region (0.16  
21 eConsults per 1,000 people) and the Mississauga Halton region (0.36 eConsults per 1,000  
22 people).<sup>(11)</sup> This increased uptake likely stems from the fact that these services were able to  
23 build on an established model of care, and leverage the network of support originally generated  
24 in Ontario. AB is the outlier in this regard, as it showed an irregular pattern of usage growth  
25 reflecting its origins as an eReferral platform on which eConsult capabilities were only fully  
26 utilized after several years of implementation. Furthermore, it is worth noting that the AB service  
27 was implemented within a pre-established platform (i.e. Netcare) that already had a substantial  
28 user base in the province. As such, recruitment was less burdensome, as it entailed getting PCPs  
29 to use a new function within a familiar platform, rather than encouraging them to learn an  
30  
31  
32  
33  
34  
35  
36  
37  
38  
39  
40  
41  
42  
43  
44  
45  
46  
47  
48  
49  
50  
51  
52  
53  
54  
55  
56  
57  
58  
59  
60



1  
2  
3 entirely new application, which potentially explains the rapid growth in usage in 2017 when the  
4 service's eConsult capabilities were first emphasized.  
5  
6

7  
8 More consistency between provinces was seen in PCPs' responses to closeout surveys  
9  
10 among the three services where these surveys were used (MB, QC, NL), particularly between  
11  
12 QC and NL. MB demonstrated results that varied from the other two provinces, likely due to QC  
13  
14 and NL having a larger number of completed cases, (450 and 1,656, respectively), allowing for a  
15  
16 more robust sample. This assumption is supported by the latest numbers reported by the  
17  
18 Champlain BASE™ eConsult service. In a recent study assessing 14,105 Champlain BASE  
19  
20 eConsult cases completed over a five-year period, PCPs' survey responses closely aligned with  
21  
22 those from the QC and NL services: PCPs reported new/additional advice in 57% of cases  
23  
24 (versus 58% in QC and 54% in NL), and 32% of cases resulted in a face-to-face referral (versus  
25  
26 27% in QC and 29% in NL).<sup>(8)</sup> Given time, we anticipate that survey responses for the MB  
27  
28 service will draw closer to this range.  
29  
30  
31  
32

33 The main strength of this study is the breadth of its data, which spans four provinces and  
34  
35 multiple regions. By collating measures of eConsult's impact across multiple jurisdictions, our  
36  
37 findings make a strong case for eConsult's generalizability and scalability. However, our study  
38  
39 also has several limitations. The data included was observational and clinician based, which does  
40  
41 not allow for a direct patient perspective. Differences in service structure and data collection  
42  
43 meant some metrics could not be captured across all participating services. This was most  
44  
45 notable for the AB service, which does not incorporate a closeout survey into its process and as  
46  
47 such could not provide direct provider feedback. Furthermore, differences in structure and  
48  
49 delivery between the AB service and the others using the BASE™ model present a challenge to  
50  
51 direct comparison. Future studies should explore these issues using a standard survey across all  
52  
53  
54  
55  
56  
57  
58  
59  
60

1  
2  
3 jurisdictions. Additionally, patient participants should be sought directly to provide further  
4  
5 insight from the patient perspective.  
6

## 7 8 **Conclusion**

9  
10 The eConsult service has been successfully implemented in four new provinces across Canada,  
11  
12 three using the BASE™ model (MB, QC, NL) and one incorporating eConsult capabilities into  
13  
14 an existing eReferral platform (AB). Implementation strategies and scope varied, but services  
15  
16 demonstrated consistency on several key metrics, most notably case outcomes. Further time and  
17  
18 research is needed to assess the long-term sustainability of these services and their impact on  
19  
20 outcomes affecting patient health.  
21  
22

## 23 24 **Acknowledgements**

25  
26 The authors wish to thank the PCPs and specialists who use the service, and Justin Joschko for  
27  
28 his assistance in editing the manuscript and preparing it for publication.  
29

## 30 31 **Contributorship statement**

32  
33 CL and EK conceived of and designed the study, and contributed to the data analysis and  
34  
35 drafting of the publication. AB, JC, MDP, GF, JG, LI, LO, RM, VN, and AS contributed data to  
36  
37 the study and were involved with its conception, conduct, analysis, and reporting. ND  
38  
39 contributed to its data analysis. All authors helped write and edit the manuscript, and approved  
40  
41 the final draft.  
42  
43

## 44 45 **Funding**

46  
47 Funding for this project was provided through the Canadian Institutes of Health Research. The  
48  
49 authors affirm their independence from these funders. The funders played no part in the study  
50  
51 design, collection, analysis, or interpretation of the data, in the writing of the report, or in the  
52  
53 decision to submit the article for publication. All authors had full access to all the data in the  
54  
55  
56  
57  
58  
59  
60

1  
2  
3 study and can take responsibility for the integrity of the data and the accuracy of the data  
4  
5 analysis.

### 6 7 8 **Competing interest declaration**

9  
10 All authors have completed the ICMJE uniform disclosure form at  
11  
12 [www.icmje.org/coi\\_disclosure.pdf](http://www.icmje.org/coi_disclosure.pdf) and declare: no support from any organisation for the  
13  
14 submitted work; no financial relationships with any organisations that might have an interest in  
15  
16 the submitted work in the previous three years; no other relationships or activities that could  
17  
18 appear to have influenced the submitted work.

### 19 20 21 22 **Ethics approval**

23  
24 This study was approved by the Ottawa Health Science Network Research Ethics Board  
25  
26 (Protocol # 2009848-01H).

### 27 28 29 **Data availability statement**

30  
31 Data from the study is available from the corresponding author upon reasonable request.

### 32 33 34 **Transparency declaration**

35  
36 The lead author, CL, affirms that the manuscript is an honest, accurate, and transparent account  
37  
38 of the study being reported; that no important aspects of the study have been omitted; and that  
39  
40 any discrepancies from the study as planned (and, if relevant, registered) have been explained.

41  
42 All authors had full access to the data and can take responsibility for the integrity of the data and  
43  
44 the accuracy of the analysis.

### 45 46 47 **Copyright/licence for publication**

48  
49 The Corresponding Author has the right to grant on behalf of all authors and does grant on behalf  
50  
51 of all authors, a worldwide licence to the Publishers and its licensees in perpetuity, in all forms,  
52  
53 formats and media (whether known now or created in the future), to i) publish, reproduce,  
54  
55

1  
2  
3 distribute, display and store the Contribution, ii) translate the Contribution into other languages,  
4  
5 create adaptations, reprints, include within collections and create summaries, extracts and/or,  
6  
7 abstracts of the Contribution, iii) create any other derivative work(s) based on the Contribution,  
8  
9  
10 iv) to exploit all subsidiary rights in the Contribution, v) the inclusion of electronic links from  
11  
12 the Contribution to third party material where-ever it may be located; and, vi) licence any third  
13  
14 party to do any or all of the above.  
15  
16  
17  
18  
19  
20  
21  
22  
23  
24  
25  
26  
27  
28  
29  
30  
31  
32  
33  
34  
35  
36  
37  
38  
39  
40  
41  
42  
43  
44  
45  
46  
47  
48  
49  
50  
51  
52  
53  
54  
55  
56  
57  
58  
59  
60

## References

- 1) Canadian Institute for Health Information. *How Canada Compares: Results From The Commonwealth Fund's 2016 International Health Policy Survey of Adults in 11 Countries*. Ottawa: Canadian Institute for Health Information; 2012.  
<https://www.cihi.ca/sites/default/files/document/text-alternative-version-2016-cmwf-en-web.pdf>, 14 July, 2017
- 2) Canadian Intitute for Health Information. *Health Care in Canada, 2012: A Focus on Wait Times*. Ottawa: Canadian Institute for Health Information; 2012.  
[https://secure.cihi.ca/free\\_products/HCIC2012-FullReport-ENweb.pdf](https://secure.cihi.ca/free_products/HCIC2012-FullReport-ENweb.pdf), 14 July, 2017
- 3) Jaakkimainen L, Glazier R, Barnsley J, Salkeld E, Lu H, Tu K. Waiting to see the specialist: patient and provider characteristics of wait times from primary to specialty care. *BMC Family Practice* 2014;15(1):16.
- 4) Thind A, Stewart M, Manuel D, Freeman T, Terry A, Chevendra V, et al. What are wait times to see a specialist? An analysis of 26,942 referrals in southwestern Ontario. *Healthcare Policy* 2012;8(1):80.
- 5) Thanh NX, Wanke M, McGeachy L. Wait time from primary to specialty care: a trend analysis from Edmonton, Canada. *Healthcare Policy* 2013;8(4):35-44.
- 6) Neimanis I, Gaebel K, Dickson R, Levy R, Goebel C, Zizzo A, et al. Referral processes and wait times in primary care. *Canadian Family Physician* 2017;63(8):619-24.
- 7) Barua B, Esmail N. *Waiting Your Turn: Wait Times for Health Care in Canada*. Vancouver: Fraser Institute; 2013. <http://www.fraserinstitute.org/uploadedFiles/fraser-ca/Content/research-news/research/publications/waiting-your-turn-2013.pdf>, 14 July, 2017

- 1  
2  
3 8) Liddy C, Moroz I, Afkham A, Keely E. Sustainability of a primary care driven eConsult  
4 service. *Annals Of Family Medicine* 2018;16(2):120-8.  
5  
6
- 7  
8 9) Bégin HM, Eggertson L, Macdonald N. A country of perpetual pilot projects. *Canadian*  
9  
10 *Medical Association Journal* 2009;180(12):1185.  
11
- 12 10) Naylor D, Girard F, Mintz JM, Fraser N, Jenkins T, Power C, et al. Unleashing  
13  
14 *Innovation: Excellent Healthcare for Canada: Report of the Advisory Panel on Healthcare*  
15 *Innovation*. Ottawa, ON: Government of Canada; 2015.  
16  
17
- 18 11) Liddy C, Moroz I, Afkham A, Keely E. Evaluating the Implementation of The Champlain  
19  
20 *BASE eConsult Service in a New Region of Ontario, Canada: A Cross-Sectional Study.*  
21  
22 *Healthcare Policy* 2017;13(2):79-95.  
23  
24
- 25 12) Canadian Foundation for Healthcare Improvement. *Connected Medicine: Enhancing*  
26  
27 *Access to Specialist Consult e-Collaborative (Access to Specialist Consult).*  
28  
29 <http://www.cfhi-fcass.ca/WhatWeDo/access> 12 October ,2018  
30  
31
- 32 13) Canadian Foundation for Healthcare Improvement. *Connected Medicine.*  
33  
34 <https://www.cfhi-fcass.ca/WhatWeDo/connected-medicine> 12 October, 2018  
35  
36
- 37 14) Glasgow RE, Vogt TM, Boles SM. Evaluating the public health impact of health  
38  
39 *promotion interventions: the RE-AIM framework. Am J Public Health* 1999  
40  
41 *Sep;89(9):1322-7.*  
42  
43
- 44 15) Liddy C, Moroz I, Joschko J, Horsley T, Kuziemy C, Kovacs Burns K, et al. Using an  
45  
46 *integrated knowledge translation (IKT) approach to enable policy change for electronic*  
47  
48 *consultations in Canada. Healthcare Policy* 2018;14(1):19-29  
49  
50
- 51 16) Statistics Canada. *Canada at a Glance 2018: Population.*  
52  
53 <https://www150.statcan.gc.ca/n1/pub/12-581-x/2018000/pop-eng.htm> 14 December, 2018  
54  
55  
56  
57  
58  
59

- 1  
2  
3 17) Nabelsi V, Lévesque-Chouinard A, Roy M-C. Projet BASE™ eConsult Québec. Centre  
4 Intégré de santé et de services sociaux de l'Outaouais; 2018. [https://ciyss-  
7 outaouais.gouv.qc.ca/wp-content/uploads/2018/06/R%C3%A9sum%C3%A9s-  
8 affiches.pdf](https://ciyss-<br/>5 outaouais.gouv.qc.ca/wp-content/uploads/2018/06/R%C3%A9sum%C3%A9s-<br/>6 affiches.pdf) 4 December, 2018.  
9  
10  
11  
12 18) Réseau-1 Québec. Scaling-up eConsult in Primary Health Care: a policy analysis in four  
13 Canadian provinces. [http://reseau1quebec.ca/projets-isspli/scaling-up-econsult-in-  
15 primary-health-care-a-policy-analysis-in-four-canadian-provinces/](http://reseau1quebec.ca/projets-isspli/scaling-up-econsult-in-<br/>14 primary-health-care-a-policy-analysis-in-four-canadian-provinces/) 4 December, 2018.  
16  
17  
18 19) Centre intégré de santé et de services sociaux de l'Outaouais. « eConsult Québec » : à un  
19 clic d'un médecin spécialiste! [https://ciyss-outaouais.gouv.qc.ca/wp-  
21 content/uploads/2018/04/Bulletin-Au-fil-5-avril-2018-n61-3.pdf](https://ciyss-outaouais.gouv.qc.ca/wp-<br/>20 content/uploads/2018/04/Bulletin-Au-fil-5-avril-2018-n61-3.pdf) 4 December, 2018.  
22  
23  
24 20) Mercier J. Un spécialiste en quelques clics. [https://www.ledroit.com/actualites/sante/un-  
26 specialiste-en-quelques-clics-746477a18b3b98b227809525af6f6e6e](https://www.ledroit.com/actualites/sante/un-<br/>25 specialiste-en-quelques-clics-746477a18b3b98b227809525af6f6e6e) 4 December, 2018.  
27  
28  
29  
30  
31  
32  
33  
34  
35  
36  
37  
38  
39  
40  
41  
42  
43  
44  
45  
46  
47  
48  
49  
50  
51  
52  
53  
54  
55  
56  
57  
58  
59  
60

## Figure Legends

**Figure 1.** Timeline of the Canadian Foundation for Healthcare Improvement's two-phase Connected Medicine Collaborative

**Figure 2.** The top ten most frequently requested specialties across services

AB = Alberta; MB = Manitoba; QC = Quebec, NL = Newfoundland and Labrador

**Figure 3.** Which of the following best describes the outcome of this eConsult for your patient?

QC = Quebec, NL = Newfoundland and Labrador

**Figure 4.** Impact of eConsult on referral based on PCP response to closeout survey

QC = Quebec, NL = Newfoundland and Labrador, MB = Manitoba

**Figure 5.** Primary care provider-reported value of eConsult for their patients on a 5-point Likert scale

QC = Quebec, NL = Newfoundland and Labrador, MB = Manitoba

**Figure 6.** PCP enrollment in eConsult services by month

**Figure 7.** Monthly case volume of eConsult by province for Newfoundland and Labrador, Quebec, and Manitoba

**Figure 8.** Monthly case volume of eConsult in Alberta (Newfoundland and Labrador, Quebec, and Manitoba services included for scale)



1  
2  
3  
4  
5  
6  
7  
8  
9  
10  
11  
12  
13  
14  
15  
16  
17  
18  
19  
20  
21  
22  
23  
24  
25  
26  
27  
28  
29  
30  
31  
32  
33  
34  
35  
36  
37  
38  
39  
40  
41  
42  
43  
44  
45  
46  
47  
48  
49  
50  
51  
52  
53  
54  
55  
56  
57  
58  
59  
60



86x27mm (300 x 300 DPI)



96x42mm (300 x 300 DPI)

1  
2  
3  
4  
5  
6  
7  
8  
9  
10  
11  
12  
13  
14  
15  
16  
17  
18  
19  
20  
21  
22  
23  
24  
25  
26  
27  
28  
29  
30  
31  
32  
33  
34  
35  
36  
37  
38  
39  
40  
41  
42  
43  
44  
45  
46  
47  
48  
49  
50  
51  
52  
53  
54  
55  
56  
57  
58  
59  
60



104x40mm (300 x 300 DPI)



94x39mm (300 x 300 DPI)

1  
2  
3  
4  
5  
6  
7  
8  
9  
10  
11  
12  
13  
14  
15  
16  
17  
18  
19  
20  
21  
22  
23  
24  
25  
26  
27  
28  
29  
30  
31  
32  
33  
34  
35  
36  
37  
38  
39  
40  
41  
42  
43  
44  
45  
46  
47  
48  
49  
50  
51  
52  
53  
54  
55  
56  
57  
58  
59  
60



97x45mm (300 x 300 DPI)



72x43mm (300 x 300 DPI)

1  
2  
3  
4  
5  
6  
7  
8  
9  
10  
11  
12  
13  
14  
15  
16  
17  
18  
19  
20  
21  
22  
23  
24  
25  
26  
27  
28  
29  
30  
31  
32  
33  
34  
35  
36  
37  
38  
39  
40  
41  
42  
43  
44  
45  
46  
47  
48  
49  
50  
51  
52  
53  
54  
55  
56  
57  
58  
59  
60

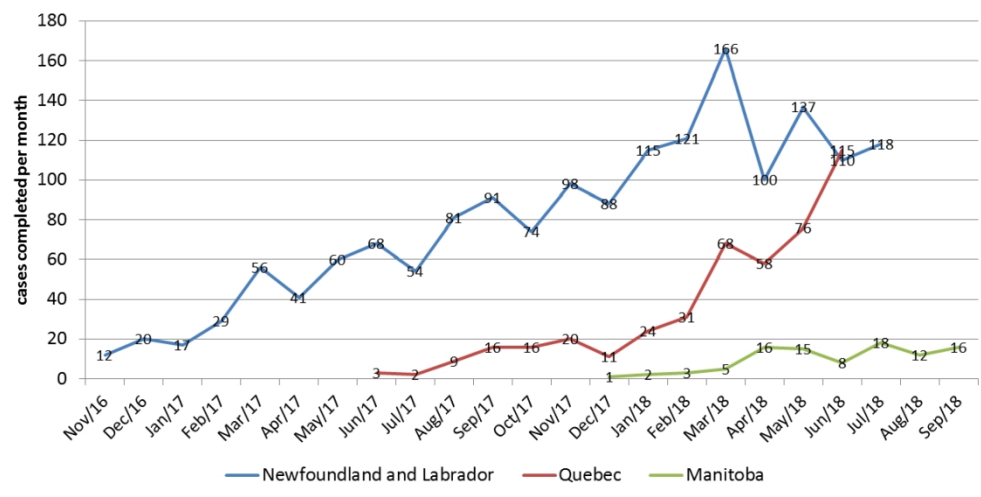

109x54mm (300 x 300 DPI)



98x51mm (300 x 300 DPI)



## Appendix A. A description of the five dimensions of care outlined by the RE-Aim framework

| RE-AIM Dimension                                                                 | Definition                                                                                                                                                          | Metrics requested                                                                                                                                                                                                                                                                                                                                                         |
|----------------------------------------------------------------------------------|---------------------------------------------------------------------------------------------------------------------------------------------------------------------|---------------------------------------------------------------------------------------------------------------------------------------------------------------------------------------------------------------------------------------------------------------------------------------------------------------------------------------------------------------------------|
| <b>Reach</b> into the target population                                          | The absolute number, proportion, and representativeness of individuals who are willing to participate in a given initiative, intervention, or program.              | <ul style="list-style-type: none"> <li>Total number of cases completed:</li> <li>Number of specialties available</li> <li>Distribution of cases across specialties (i.e. how many cases went to each specialty)</li> </ul>                                                                                                                                                |
| <b>Effectiveness</b> or efficacy                                                 | The impact of an intervention on important outcomes, including potential negative effects, quality of life, and economic outcomes.                                  | <ul style="list-style-type: none"> <li>Number of days between a case being submitted and a specialist responding (median and 75 percentile)</li> <li>Proportion of advice on new/additional action (survey Q1)</li> <li>Whether a referral was originally considered and/or ultimately provided (response to survey Q2)</li> </ul>                                        |
| <b>Adoption</b> by target settings, institutions and staff                       | The absolute number, proportion, and representativeness of settings and intervention agents (people who deliver the program) who are willing to initiate a program. | <ul style="list-style-type: none"> <li>Number of PCPs who joined the service</li> <li>Proportion of PCPs who submitted <math>\geq 1</math> case</li> <li>Number of clinics with participating PCPs</li> <li>Number of cities/towns with participating PCPs</li> <li>Number of specialists who joined the service</li> <li>Number of specialty groups available</li> </ul> |
| <b>Implementation</b> consistency, costs and adaptations made during delivery    | The consistency and fidelity to the program protocol, the costs and adaptations made during delivery.                                                               | <ul style="list-style-type: none"> <li>Steps taken to facilitate replication of eConsult in new jurisdiction (e.g. establishing partnerships, addressing privacy issues, physician engagement, and payment)</li> </ul>                                                                                                                                                    |
| <b>Maintenance</b> of intervention effects in individuals and settings over time | The extent to which a program or policy becomes institutionalized or part of the routine organizational practices and policies.                                     | <ul style="list-style-type: none"> <li>Number of cases completed over time (e.g. monthly case volume)</li> <li>Number of PCPs who joined the service during the one year period</li> <li>Evidence of sustainment and expansion (e.g. funding, new partnerships)</li> </ul>                                                                                                |

STROBE Statement—Checklist of items that should be included in reports of *cross-sectional studies*

|                           | Item No | Recommendation                                                                                                                                                                                               | Page    |
|---------------------------|---------|--------------------------------------------------------------------------------------------------------------------------------------------------------------------------------------------------------------|---------|
| <b>Title and abstract</b> | 1       | (a) Indicate the study's design with a commonly used term in the title or the abstract                                                                                                                       | 1       |
|                           |         | (b) Provide in the abstract an informative and balanced summary of what was done and what was found                                                                                                          | 2-3     |
| <b>Introduction</b>       |         |                                                                                                                                                                                                              |         |
| Background/rationale      | 2       | Explain the scientific background and rationale for the investigation being reported                                                                                                                         | 4-5     |
| Objectives                | 3       | State specific objectives, including any prespecified hypotheses                                                                                                                                             | 6       |
| <b>Methods</b>            |         |                                                                                                                                                                                                              |         |
| Study design              | 4       | Present key elements of study design early in the paper                                                                                                                                                      | 6       |
| Setting                   | 5       | Describe the setting, locations, and relevant dates, including periods of recruitment, exposure, follow-up, and data collection                                                                              | 6       |
| Participants              | 6       | (a) Give the eligibility criteria, and the sources and methods of selection of participants                                                                                                                  | 7       |
| Variables                 | 7       | Clearly define all outcomes, exposures, predictors, potential confounders, and effect modifiers. Give diagnostic criteria, if applicable                                                                     | 7       |
| Data sources/measurement  | 8*      | For each variable of interest, give sources of data and details of methods of assessment (measurement). Describe comparability of assessment methods if there is more than one group                         | 7       |
| Bias                      | 9       | Describe any efforts to address potential sources of bias                                                                                                                                                    | n/a     |
| Study size                | 10      | Explain how the study size was arrived at                                                                                                                                                                    | 7       |
| Quantitative variables    | 11      | Explain how quantitative variables were handled in the analyses. If applicable, describe which groupings were chosen and why                                                                                 | n/a     |
| Statistical methods       | 12      | (a) Describe all statistical methods, including those used to control for confounding                                                                                                                        | 7       |
|                           |         | (b) Describe any methods used to examine subgroups and interactions                                                                                                                                          | n/a     |
|                           |         | (c) Explain how missing data were addressed                                                                                                                                                                  | 7       |
|                           |         | (d) If applicable, describe analytical methods taking account of sampling strategy                                                                                                                           | n/a     |
|                           |         | (e) Describe any sensitivity analyses                                                                                                                                                                        | n/a     |
| <b>Results</b>            |         |                                                                                                                                                                                                              |         |
| Participants              | 13*     | (a) Report numbers of individuals at each stage of study—eg numbers potentially eligible, examined for eligibility, confirmed eligible, included in the study, completing follow-up, and analysed            | 8       |
|                           |         | (b) Give reasons for non-participation at each stage                                                                                                                                                         | n/a     |
|                           |         | (c) Consider use of a flow diagram                                                                                                                                                                           | n/a     |
| Descriptive data          | 14*     | (a) Give characteristics of study participants (eg demographic, clinical, social) and information on exposures and potential confounders                                                                     | 9       |
|                           |         | (b) Indicate number of participants with missing data for each variable of interest                                                                                                                          | Table 1 |
| Outcome data              | 15*     | Report numbers of outcome events or summary measures                                                                                                                                                         | 9-12    |
| Main results              | 16      | (a) Give unadjusted estimates and, if applicable, confounder-adjusted estimates and their precision (eg, 95% confidence interval). Make clear which confounders were adjusted for and why they were included | 9-12    |

|                          |    |                                                                                                                                                                            |      |
|--------------------------|----|----------------------------------------------------------------------------------------------------------------------------------------------------------------------------|------|
|                          |    | (b) Report category boundaries when continuous variables were categorized                                                                                                  | n/a  |
|                          |    | (c) If relevant, consider translating estimates of relative risk into absolute risk for a meaningful time period                                                           | n/a  |
| Other analyses           | 17 | Report other analyses done—eg analyses of subgroups and interactions, and sensitivity analyses                                                                             | 9-12 |
| <b>Discussion</b>        |    |                                                                                                                                                                            |      |
| Key results              | 18 | Summarise key results with reference to study objectives                                                                                                                   | 13   |
| Limitations              | 19 | Discuss limitations of the study, taking into account sources of potential bias or imprecision. Discuss both direction and magnitude of any potential bias                 | 15   |
| Interpretation           | 20 | Give a cautious overall interpretation of results considering objectives, limitations, multiplicity of analyses, results from similar studies, and other relevant evidence | 15   |
| Generalisability         | 21 | Discuss the generalisability (external validity) of the study results                                                                                                      | 15   |
| <b>Other information</b> |    |                                                                                                                                                                            |      |
| Funding                  | 22 | Give the source of funding and the role of the funders for the present study and, if applicable, for the original study on which the present article is based              | 16   |

\*Give information separately for exposed and unexposed groups.

**Note:** An Explanation and Elaboration article discusses each checklist item and gives methodological background and published examples of transparent reporting. The STROBE checklist is best used in conjunction with this article (freely available on the Web sites of PLoS Medicine at <http://www.plosmedicine.org/>, Annals of Internal Medicine at <http://www.annals.org/>, and Epidemiology at <http://www.epidem.com/>). Information on the STROBE Initiative is available at [www.strobe-statement.org](http://www.strobe-statement.org).
