# Supplementary material for: Supporting the spread and scale-up of electronic consultation across Canada: cross-sectional analysis
Source: PubMed Central journal article supplement — BMJ Open. 2019 May 30;9(5):e028888. doi: 10.1136/bmjopen-2018-028888 (PMC6550029; doi:10.1136/bmjopen-2018-028888), 2019-05-30
Supplement: bmjopen-2018-028888supp001.pdf [file bmjopen-2018-028888supp001.pdf]

**Appendix A.** A description of the five dimensions of care outlined by the RE-Aim framework

| <b>RE-AIM Dimension</b>                                                          | <b>Definition</b>                                                                                                                                                   | <b>Metrics requested</b>                                                                                                                                                                                                                                                                                                                                                              |
|----------------------------------------------------------------------------------|---------------------------------------------------------------------------------------------------------------------------------------------------------------------|---------------------------------------------------------------------------------------------------------------------------------------------------------------------------------------------------------------------------------------------------------------------------------------------------------------------------------------------------------------------------------------|
| <b>Reach</b> into the target population                                          | The absolute number, proportion, and representativeness of individuals who are willing to participate in a given initiative, intervention, or program.              | <ul style="list-style-type: none"> <li>• Total number of cases completed:</li> <li>• Number of specialties available</li> <li>• Distribution of cases across specialties (i.e. how many cases went to each specialty)</li> </ul>                                                                                                                                                      |
| <b>Effectiveness</b> or efficacy                                                 | The impact of an intervention on important outcomes, including potential negative effects, quality of life, and economic outcomes.                                  | <ul style="list-style-type: none"> <li>• Number of days between a case being submitted and a specialist responding (median and 75 percentile)</li> <li>• Proportion of advice on new/additional action (survey Q1)</li> <li>• Whether a referral was originally considered and/or ultimately provided (response to survey Q2)</li> </ul>                                              |
| <b>Adoption</b> by target settings, institutions and staff                       | The absolute number, proportion, and representativeness of settings and intervention agents (people who deliver the program) who are willing to initiate a program. | <ul style="list-style-type: none"> <li>• Number of PCPs who joined the service</li> <li>• Proportion of PCPs who submitted <math>\geq 1</math> case</li> <li>• Number of clinics with participating PCPs</li> <li>• Number of cities/towns with participating PCPs</li> <li>• Number of specialists who joined the service</li> <li>• Number of specialty groups available</li> </ul> |
| <b>Implementation</b> consistency, costs and adaptations made during delivery    | The consistency and fidelity to the program protocol, the costs and adaptations made during delivery.                                                               | <ul style="list-style-type: none"> <li>• Steps taken to facilitate replication of eConsult in new jurisdiction (e.g. establishing partnerships, addressing privacy issues, physician engagement, and payment)</li> </ul>                                                                                                                                                              |
| <b>Maintenance</b> of intervention effects in individuals and settings over time | The extent to which a program or policy becomes institutionalized or part of the routine organizational practices and policies.                                     | <ul style="list-style-type: none"> <li>• Number of cases completed over time (e.g. monthly case volume)</li> <li>• Number of PCPs who joined the service during the one year period</li> <li>• Evidence of sustainment and expansion (e.g. funding, new partnerships)</li> </ul>                                                                                                      |
